# Supplementary material for: Effect of peptide-based captopril analogues on angiotensin converting enzyme activity and peroxynitrite-mediated tyrosine nitration
Source: Royal Society of Chemistry journal article supplement (doi:10.1039/c1ob05148b), 2011-01-01

Supporting Information for

## Effect of Peptide-based Captopril Analogues on Angiotensin Converting Enzyme Activity and Peroxynitrite-mediated Tyrosine Nitration

by

Bhaskar J. Bhuyan and Govindasamy Mugesh\*  
Department of Inorganic and Physical Chemistry  
Indian Institute of Science, Bangalore 560012, India

Email: [mugesh@ipc.iisc.ernet.in](mailto:mugesh@ipc.iisc.ernet.in)

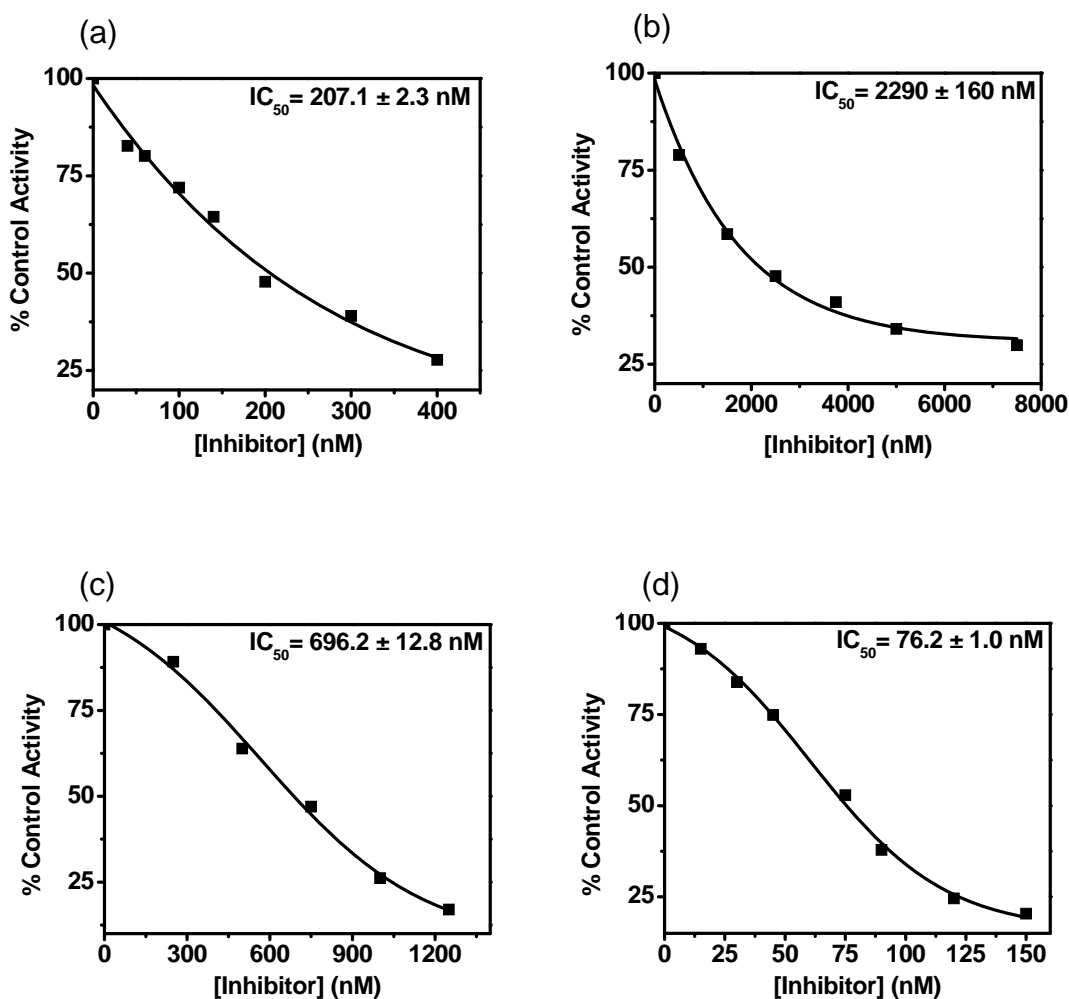

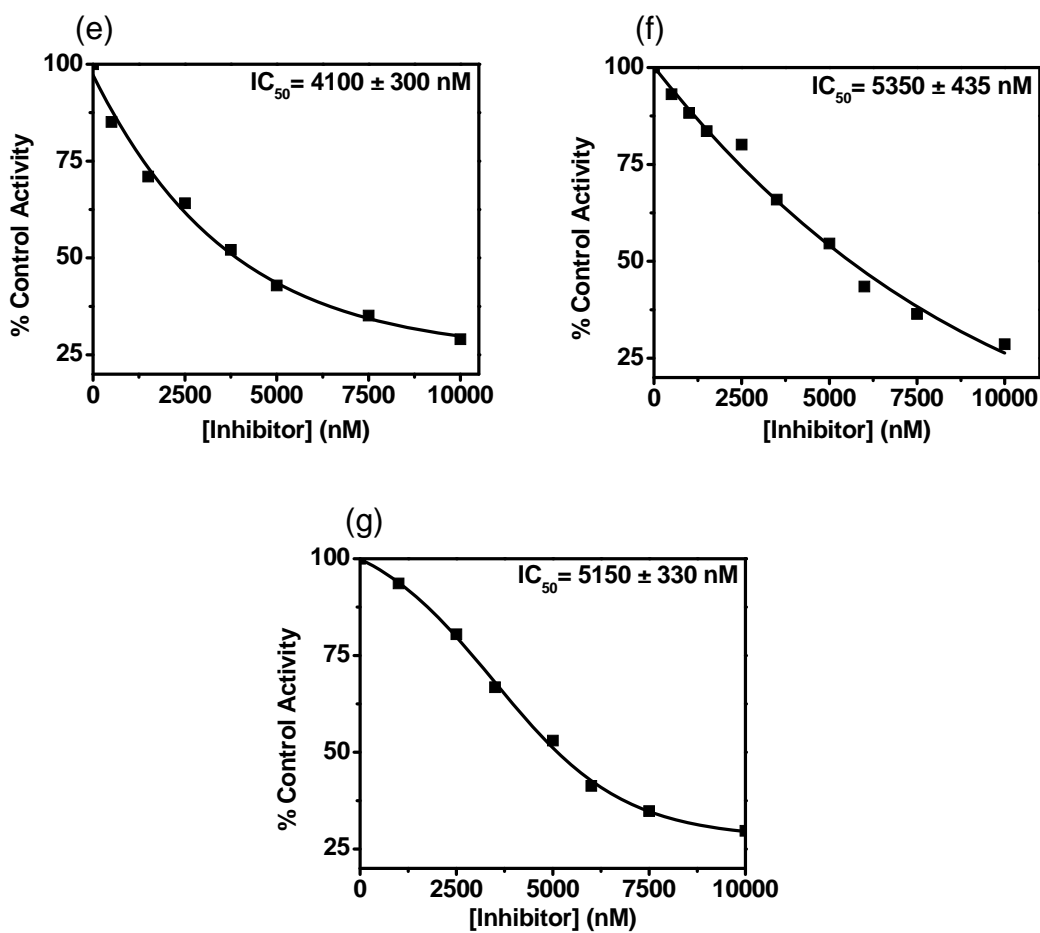

**Figure S1.** Inhibition plots for ACE-catalyzed hydrolysis of Ang I to Ang II by compounds a) **5**, b) **6**, c) **7**, d) **9**, e) **10**, f) **11** and g) **13**.

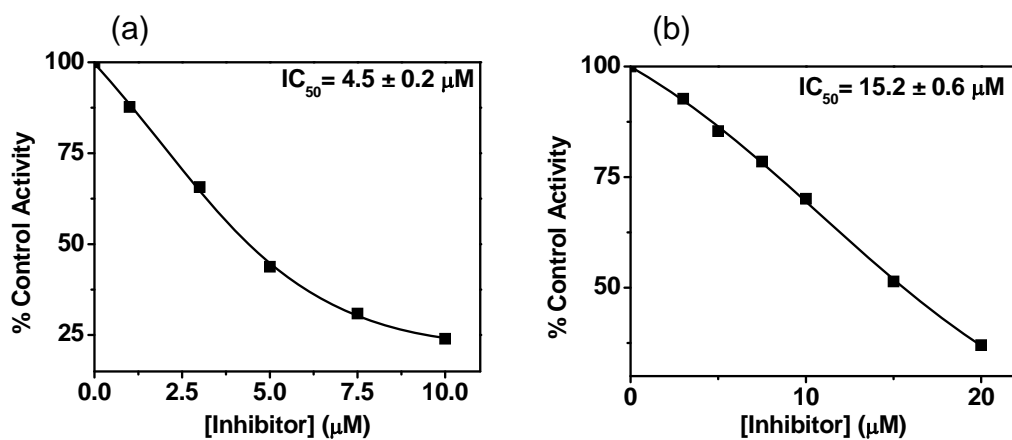

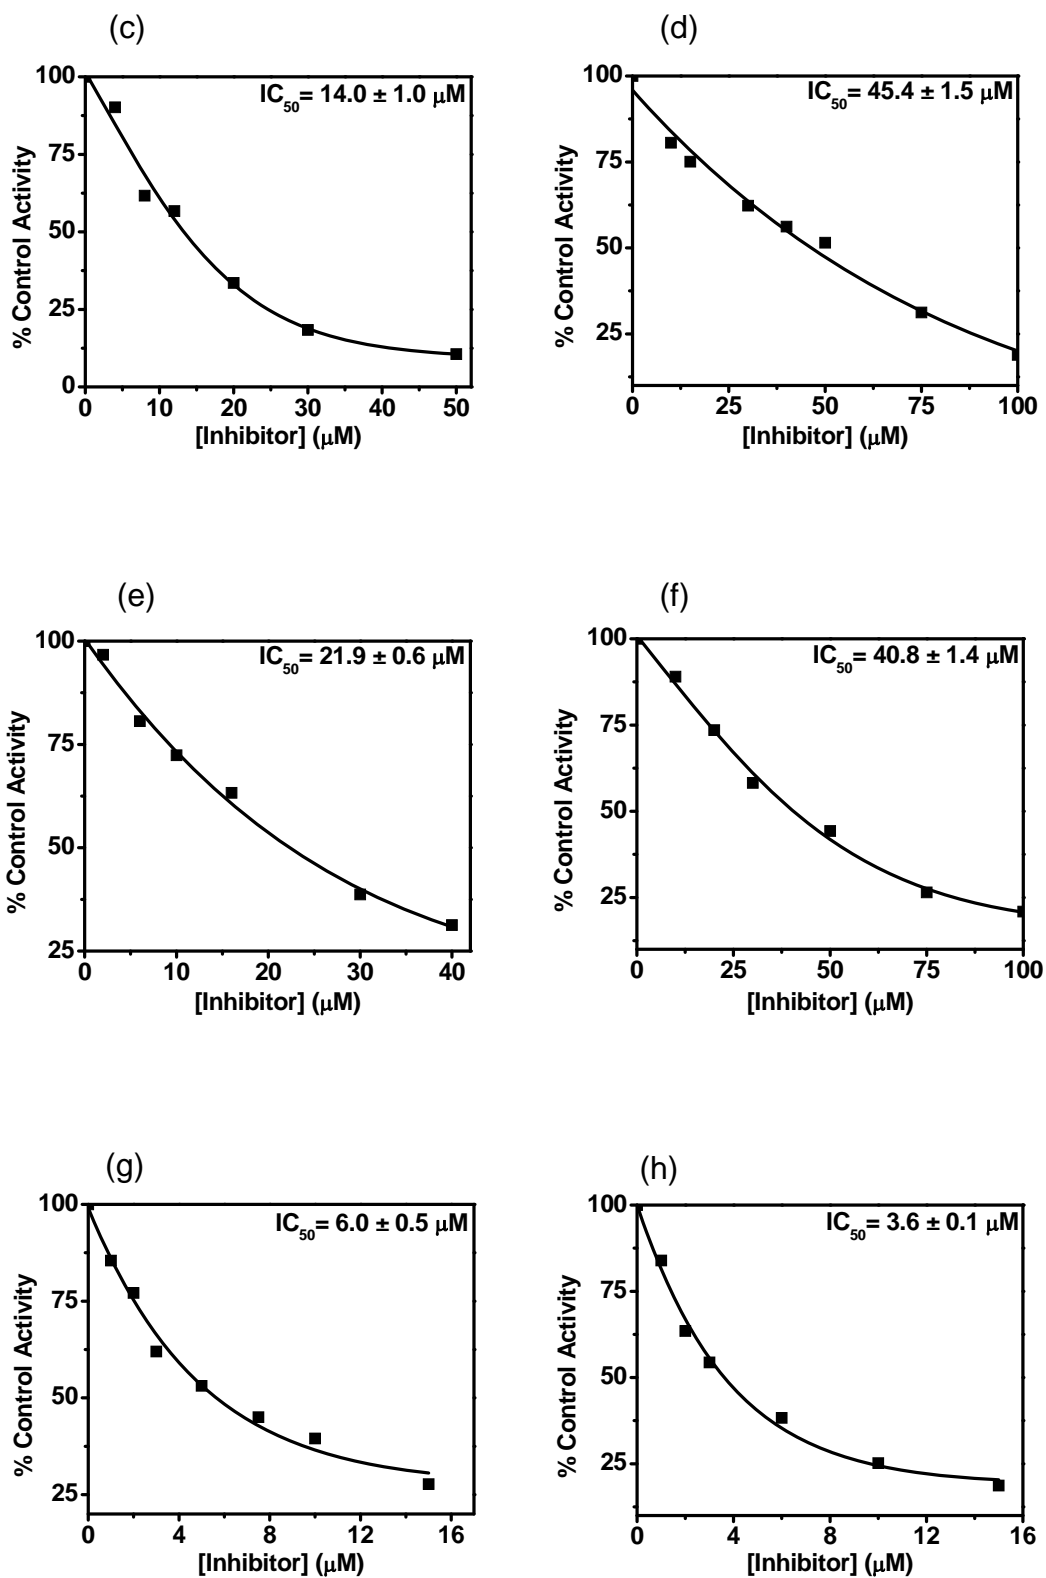

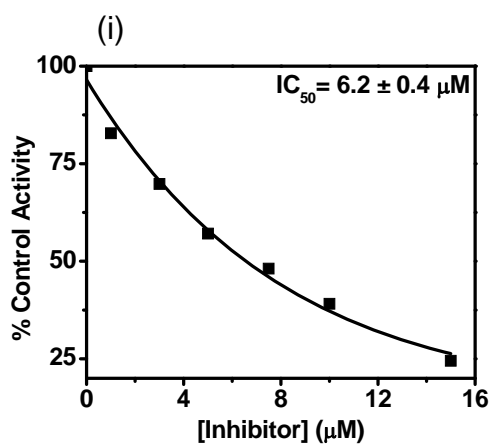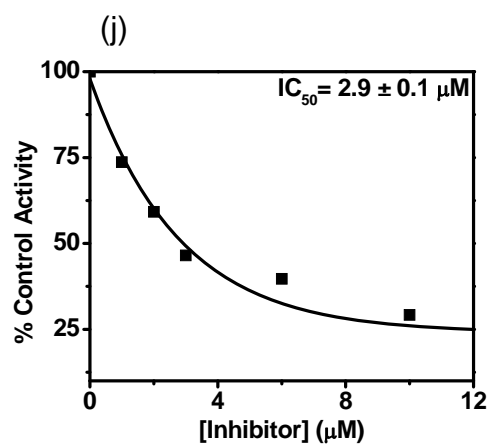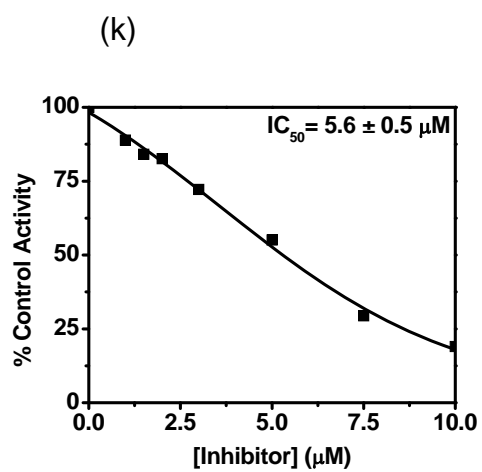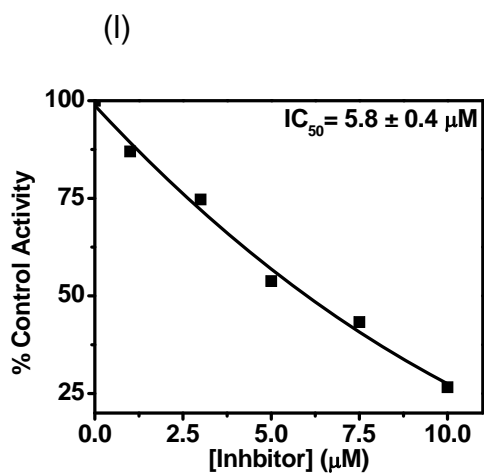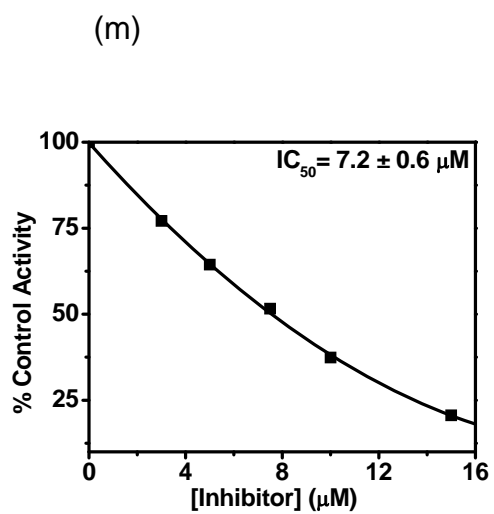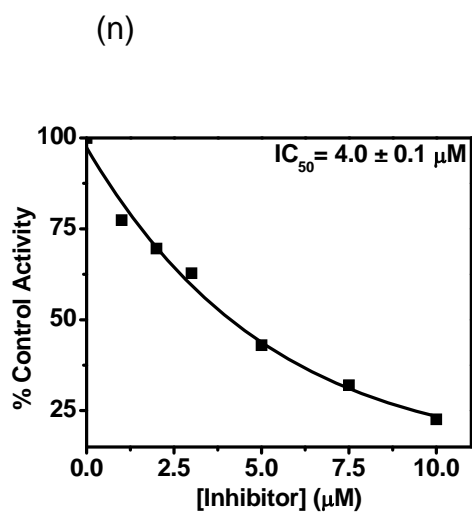

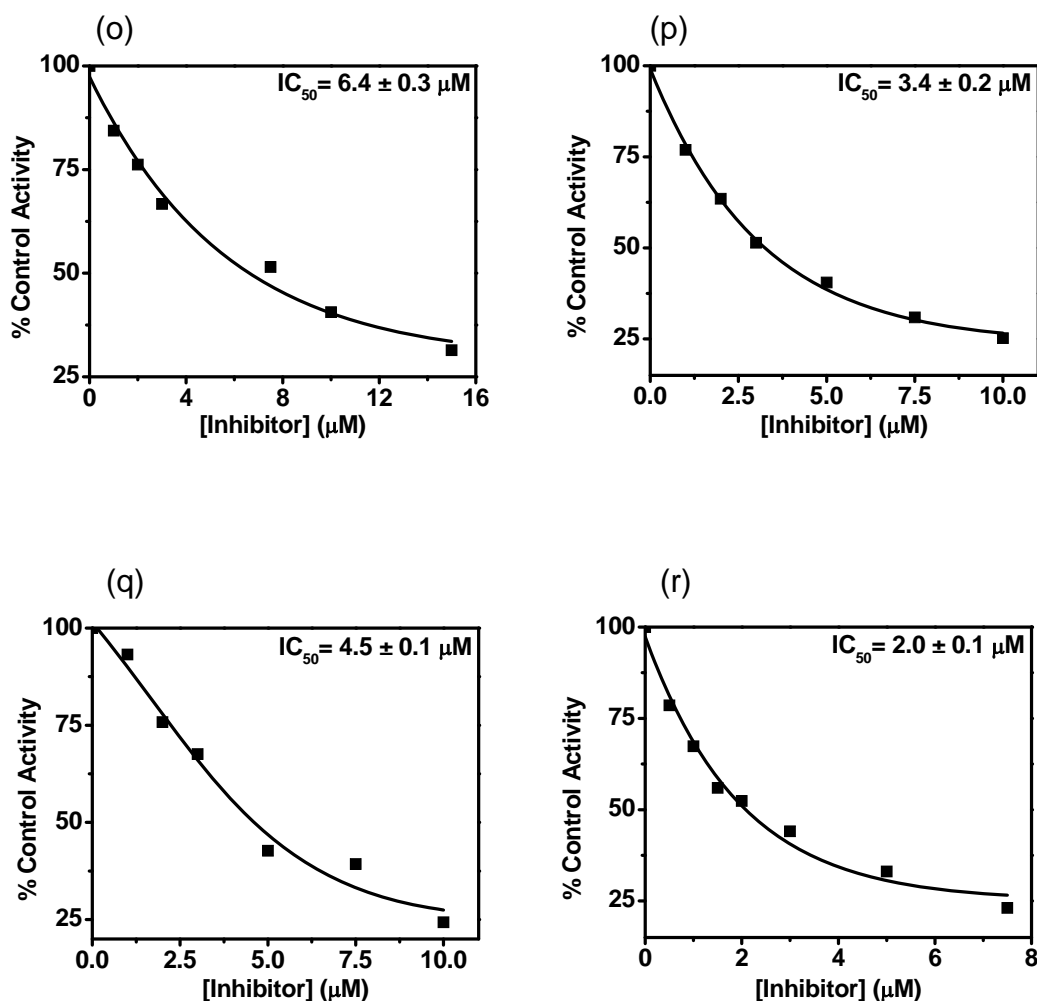

**Figure S2.** Inhibition plots for PN-mediated nitration of Ang II by compounds a) **5**, b) **6**, c) **7**, d) **23**, e) **8**, f) **22**, g) **9**, h) **31**, i) **10**, j) **28**, k) **11**, l) **32**, m) **12**, n) **29**, o) **13**, p) **33**, q) **14** and r) **30**. Assay condition: Reactions were carried out in sodium phosphate buffer (100 mM, pH 7.5) at 22 °C with a final concentration of 20 μM Ang II, 300 μM PN and different concentrations of the inhibitors.

**Table S1.** Inhibition of ACE activity by disulfide (**22** and **23**) and diselenides (**28-33**) at 50 μM concentration.

| Compound  | % Inhibition | Compound  | % Inhibition |
|-----------|--------------|-----------|--------------|
| <b>19</b> | 25.1         | <b>20</b> | 22.9         |
| <b>22</b> | 13.1         | <b>23</b> | 26.3         |
| <b>28</b> | 30.0         | <b>29</b> | 7.6          |
| <b>30</b> | 10.0         | <b>31</b> | 28.9         |
| <b>32</b> | 9.7          | <b>33</b> | 12.9         |

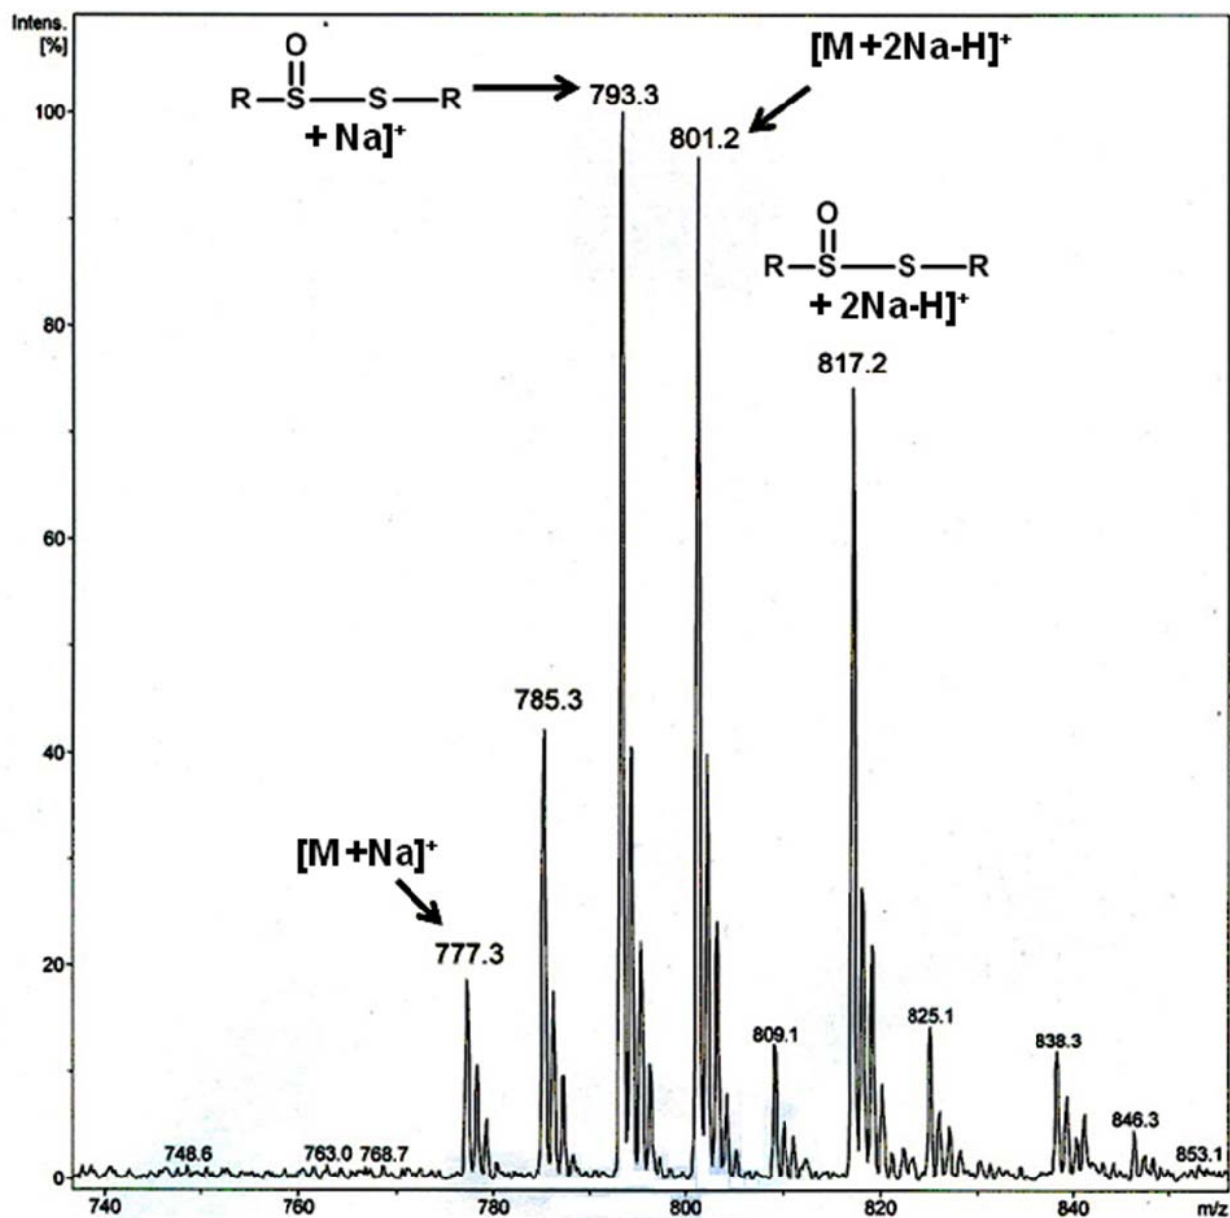

**Figure S3.** ESI mass spectrum of the reaction mixture of compound 22 with PN.

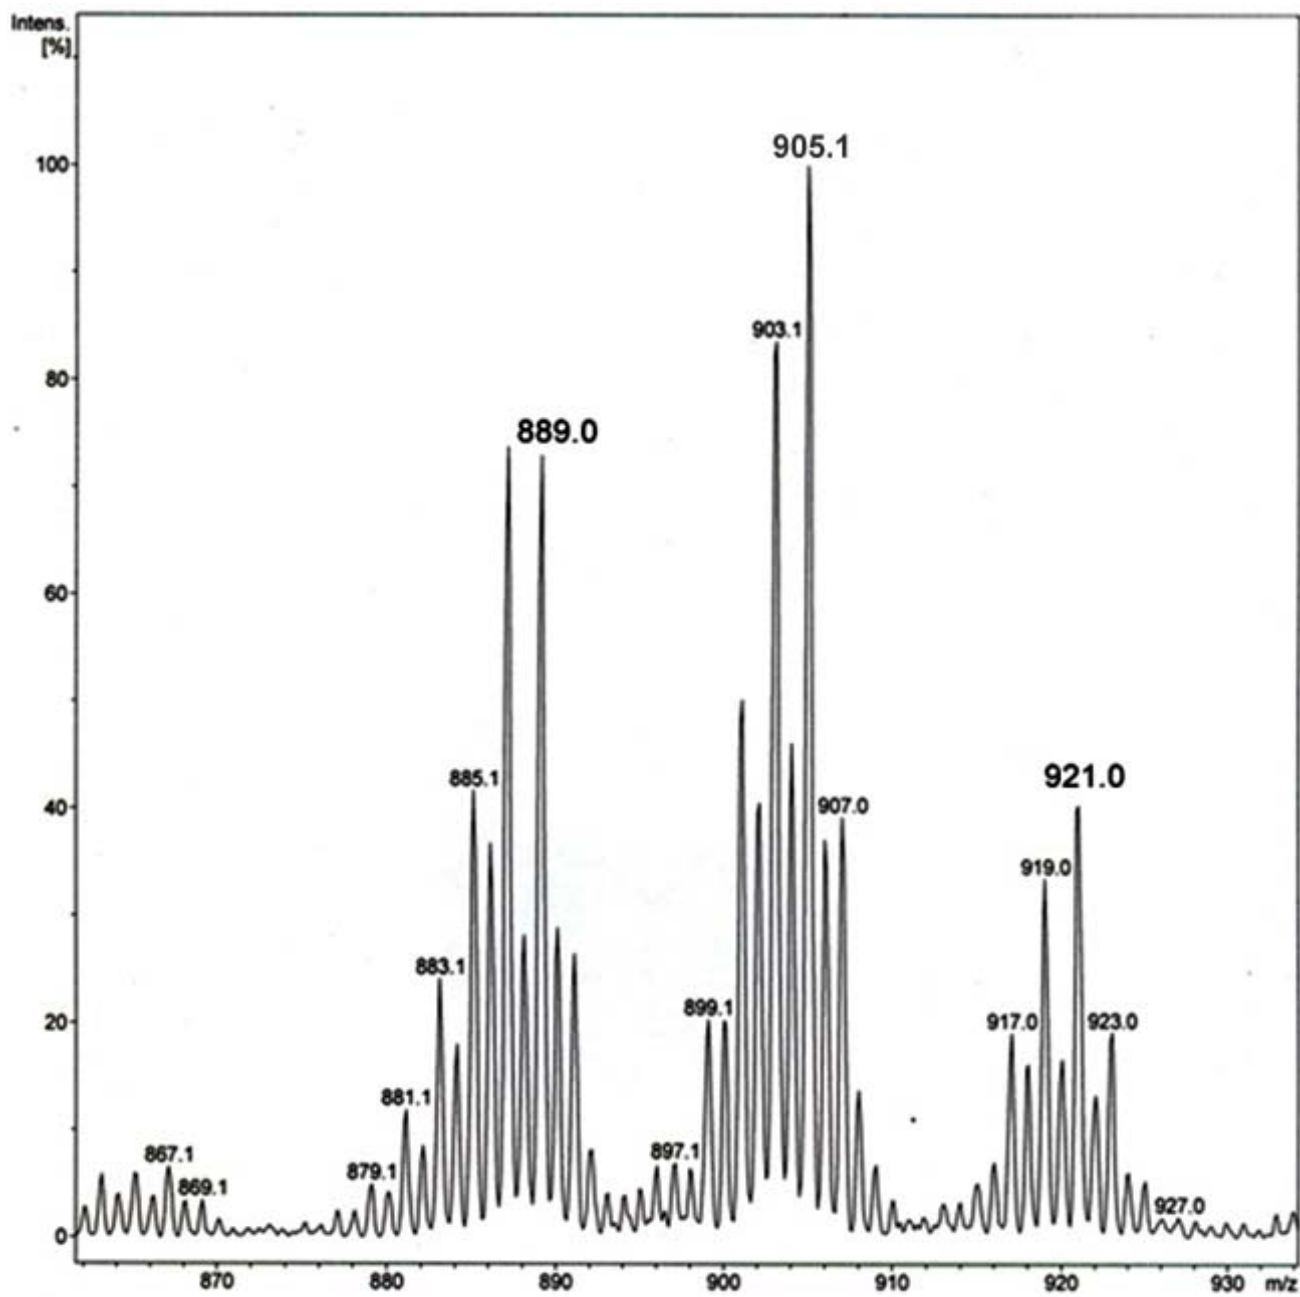

**Figure S4.** ESI mass spectrum of the reaction mixture of compound **28** with PN.

**Figure S5.**  $^1\text{H}$  NMR Spectrum of Compound **19** in  $\text{D}_2\text{O}$

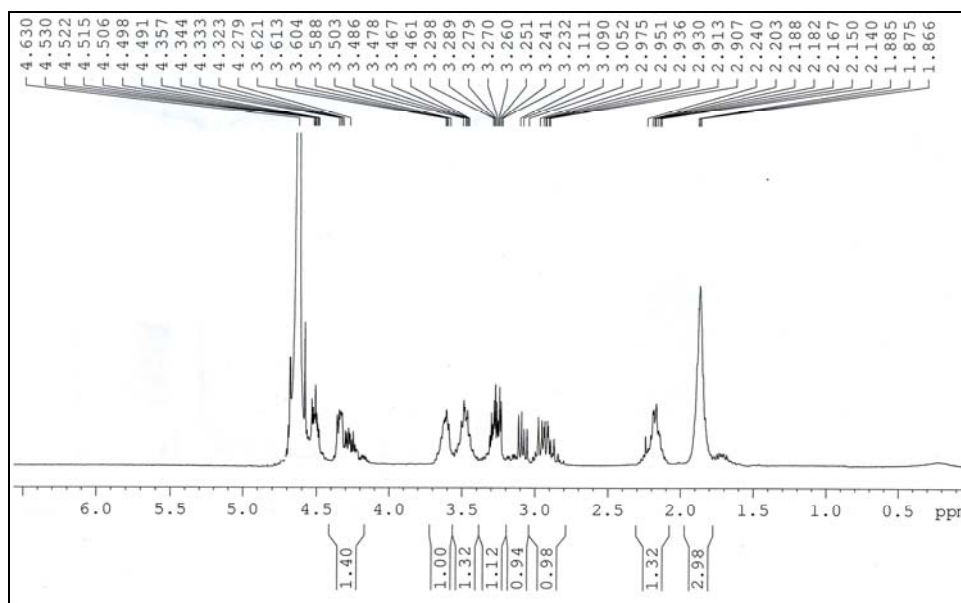

**Figure S6.**  $^{13}\text{C}$  NMR Spectrum of Compound **19** in  $\text{D}_2\text{O}$

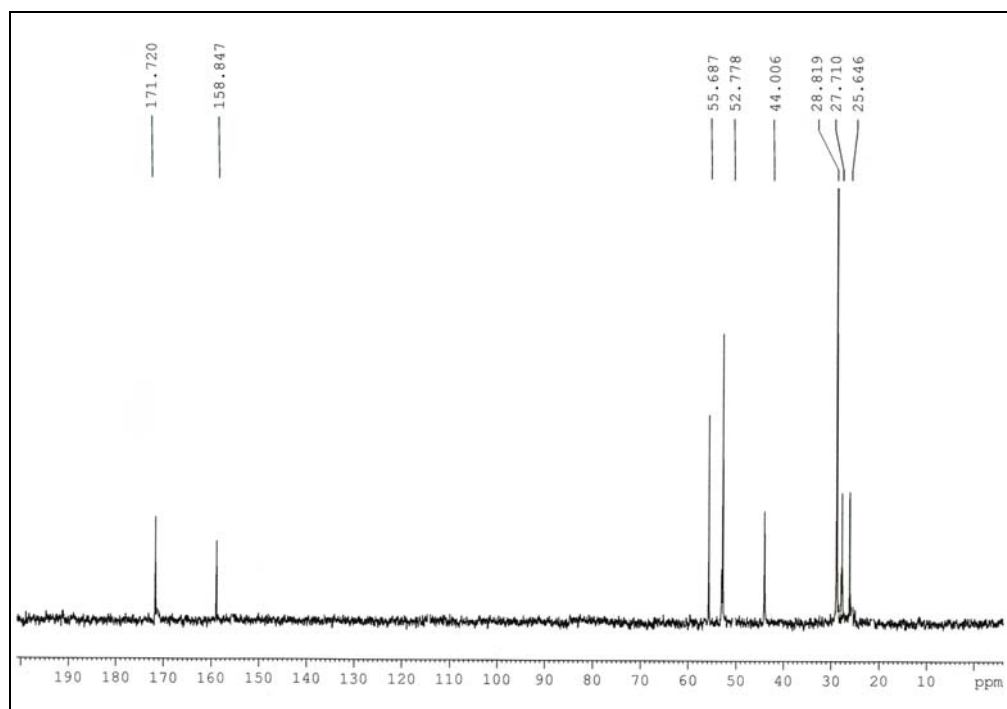



**Figure S7.**  $^{77}\text{Se}$  NMR Spectrum of Compound **19** in  $\text{D}_2\text{O}$

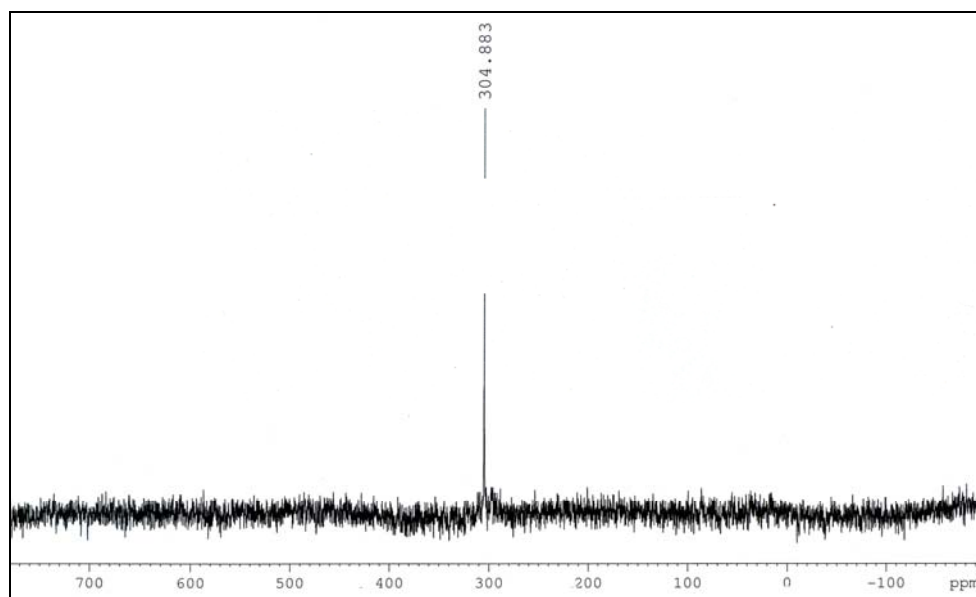

**Figure S8.** ESI mass Spectrum of the compound **19**. Calculated Mass: 531.0261, found 530.8870.

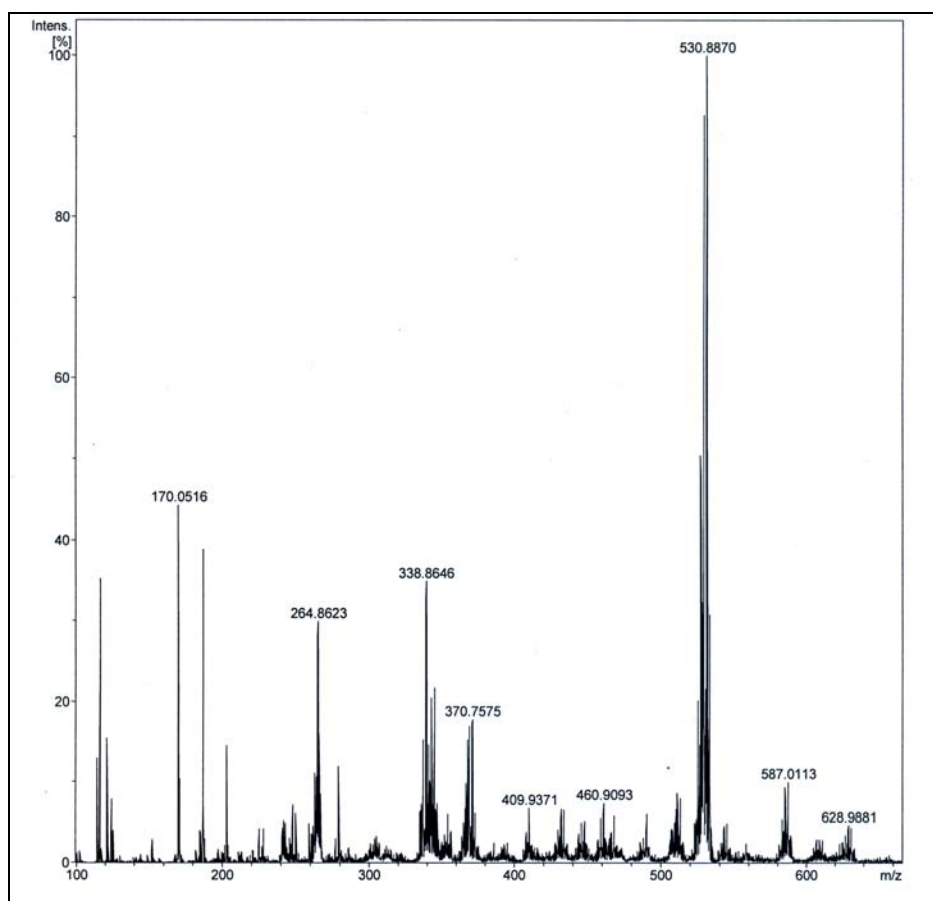

**Figure S9.**  $^1\text{H}$  NMR Spectrum of Compound **20** in  $\text{D}_2\text{O}$ .

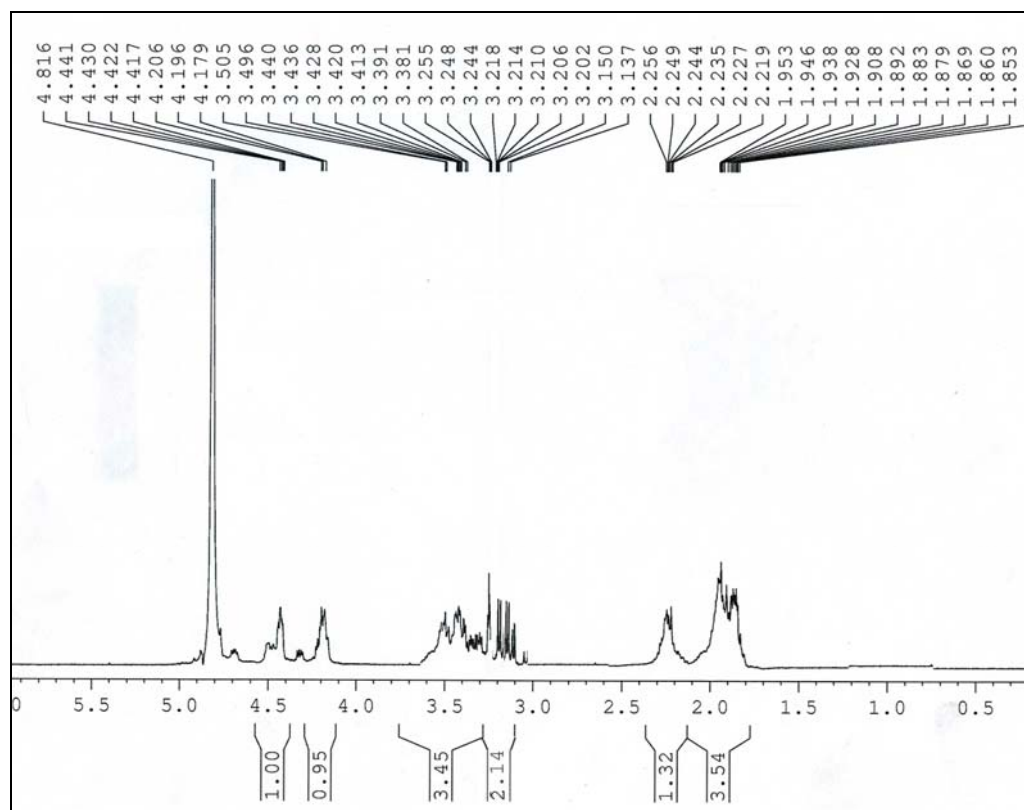

**Figure S10.**  $^{13}\text{C}$  NMR Spectrum of Compound **20** in  $\text{D}_2\text{O}$

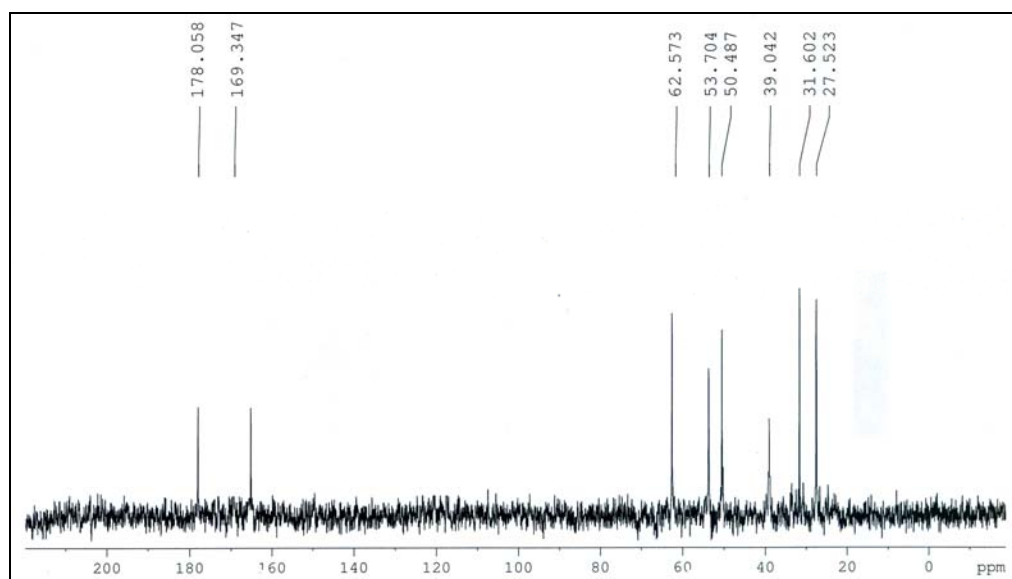

**Figure S11.** ESI mass Spectrum of the compound **20**. Calculated Mass: 435.1372, found 434.9422.

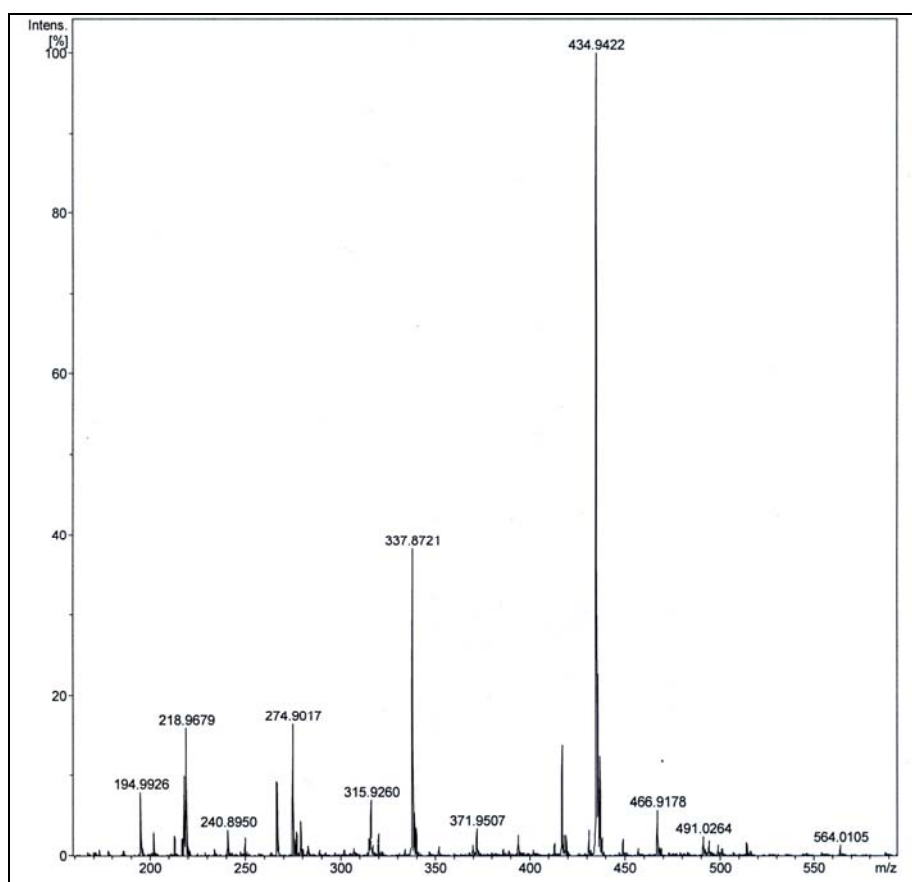

**Figure S12.**  $^1\text{H}$  NMR Spectrum of Compound **22** in  $\text{CDCl}_3$

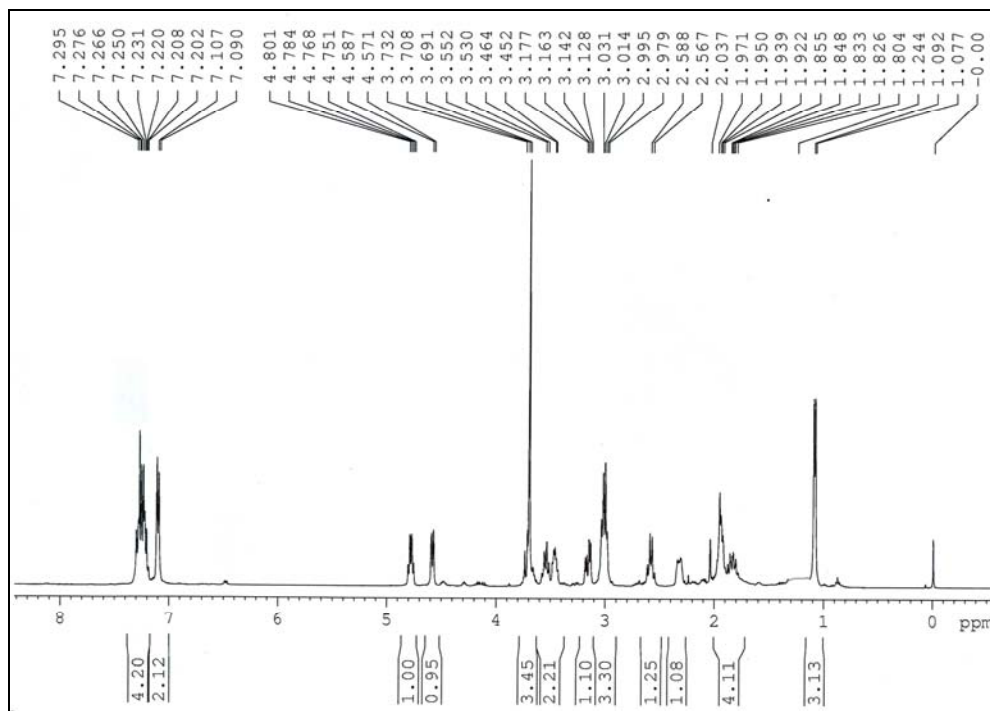

**Figure S13.**  $^{13}\text{C}$  NMR Spectrum of Compound **22** in  $\text{CDCl}_3$

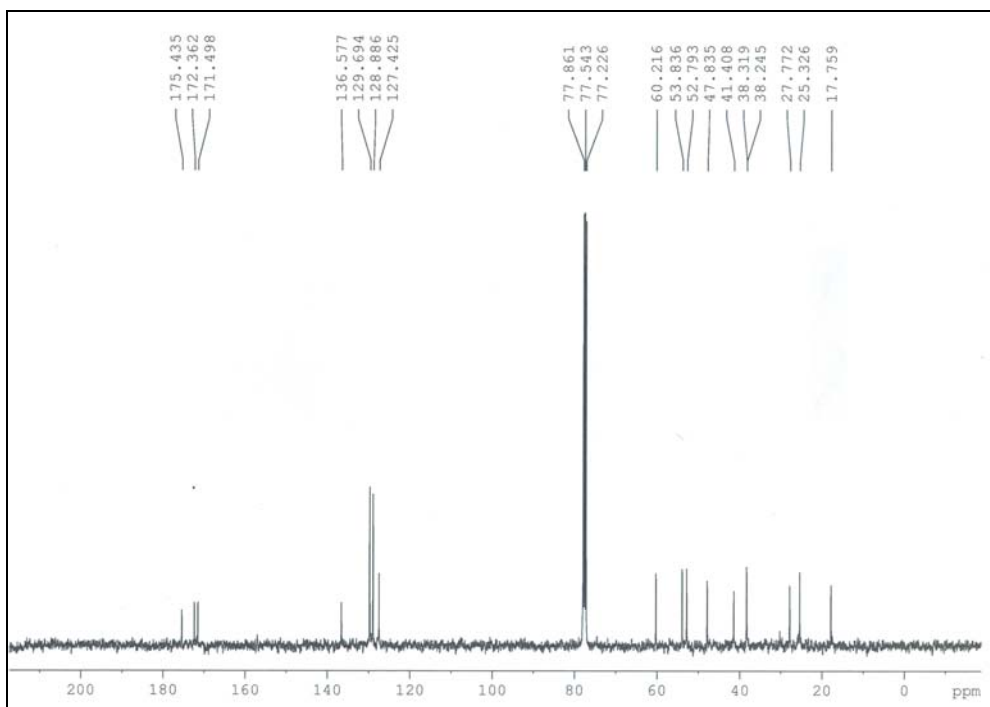

**Figure S14.** ESI mass Spectrum of the compound **22**. Calculated Mass: 777.2968, found 777.2960

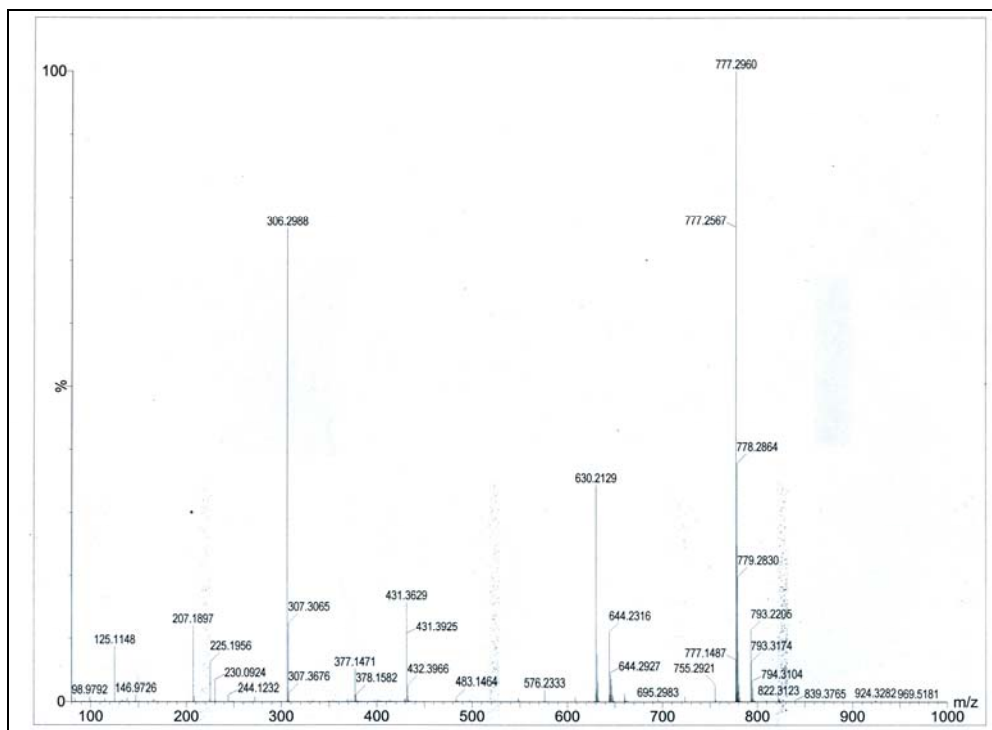

**Figure S15.**  $^1\text{H}$  NMR Spectrum of Compound **23** in  $\text{CDCl}_3$

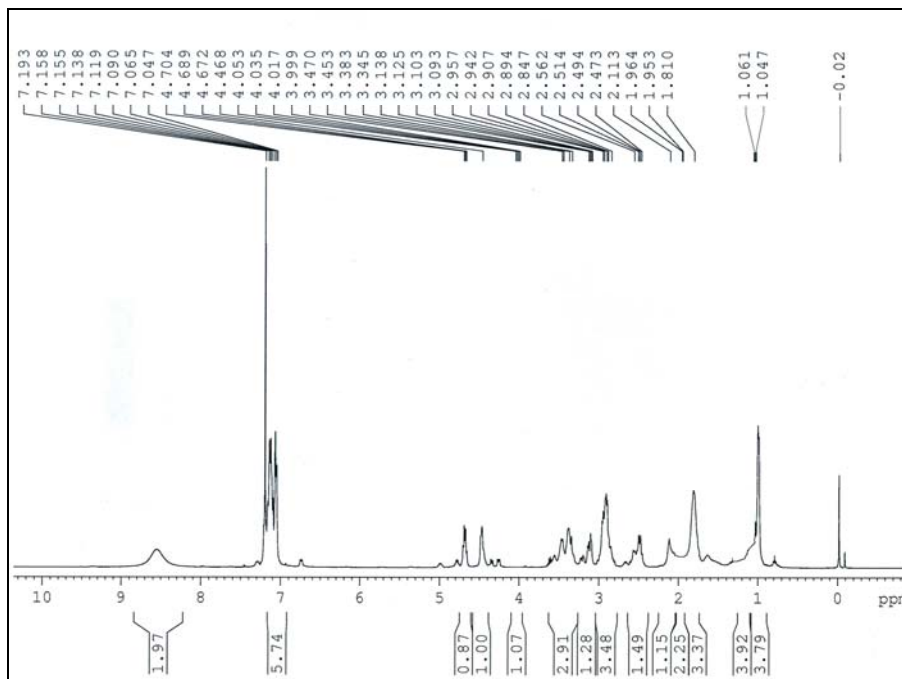

**Figure S16.**  $^{13}\text{C}$  NMR Spectrum of Compound **23** in  $\text{CDCl}_3$

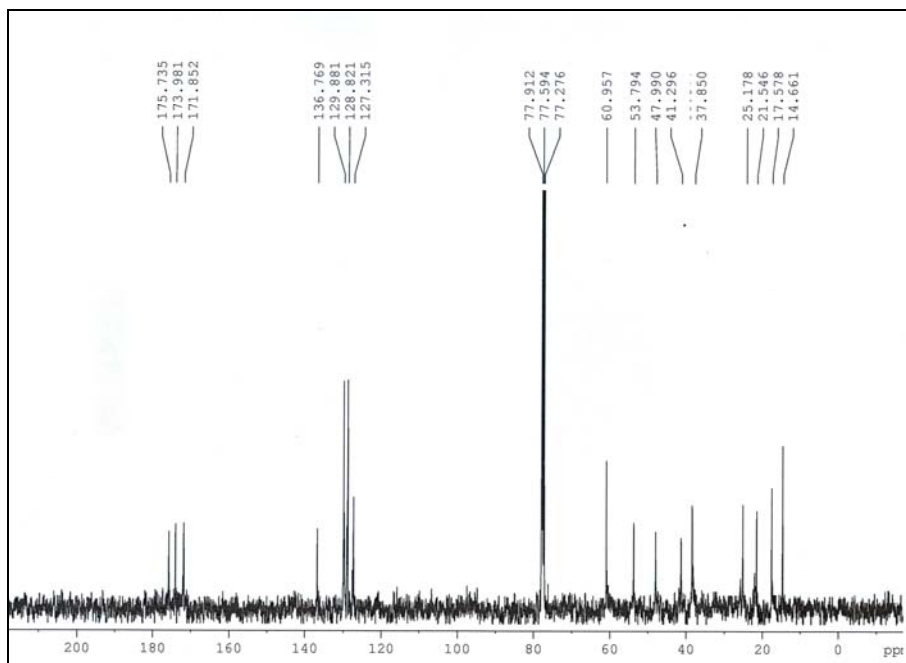

**Figure S17.** ESI mass Spectrum of the compound **23**. Calculated Mass: 725.2679, found 725.3537

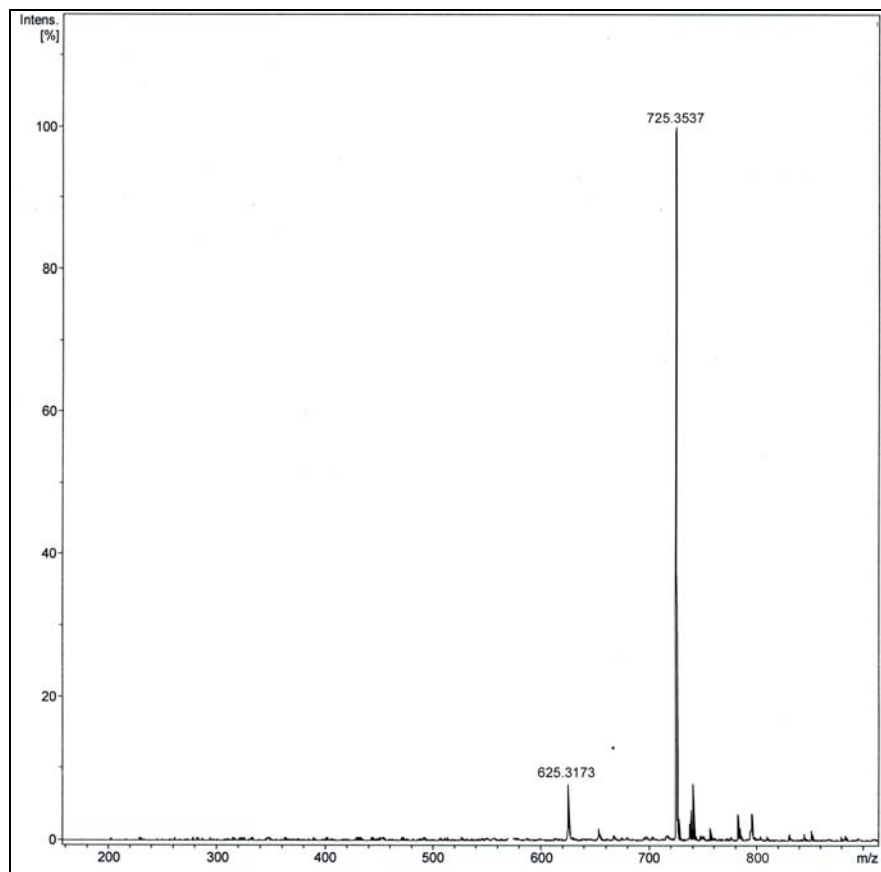

[S14]

**Figure S18.**  $^1\text{H}$  NMR Spectrum of Compound **25** in  $\text{CDCl}_3$

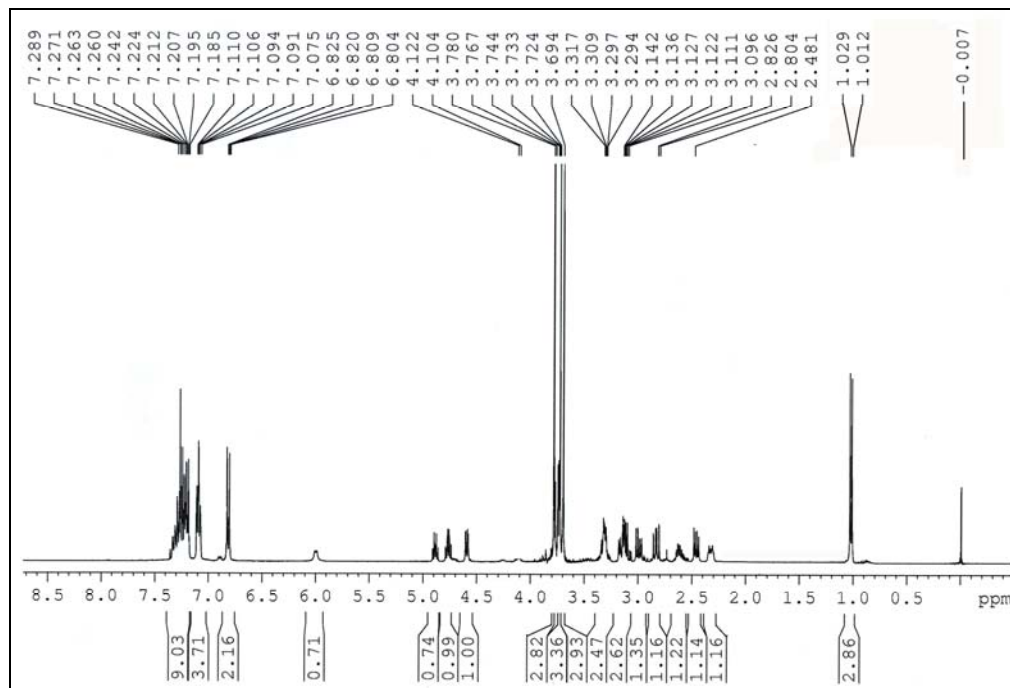

**Figure S19.**  $^{77}\text{Se}$  NMR Spectrum of Compound **25** in  $\text{CDCl}_3$

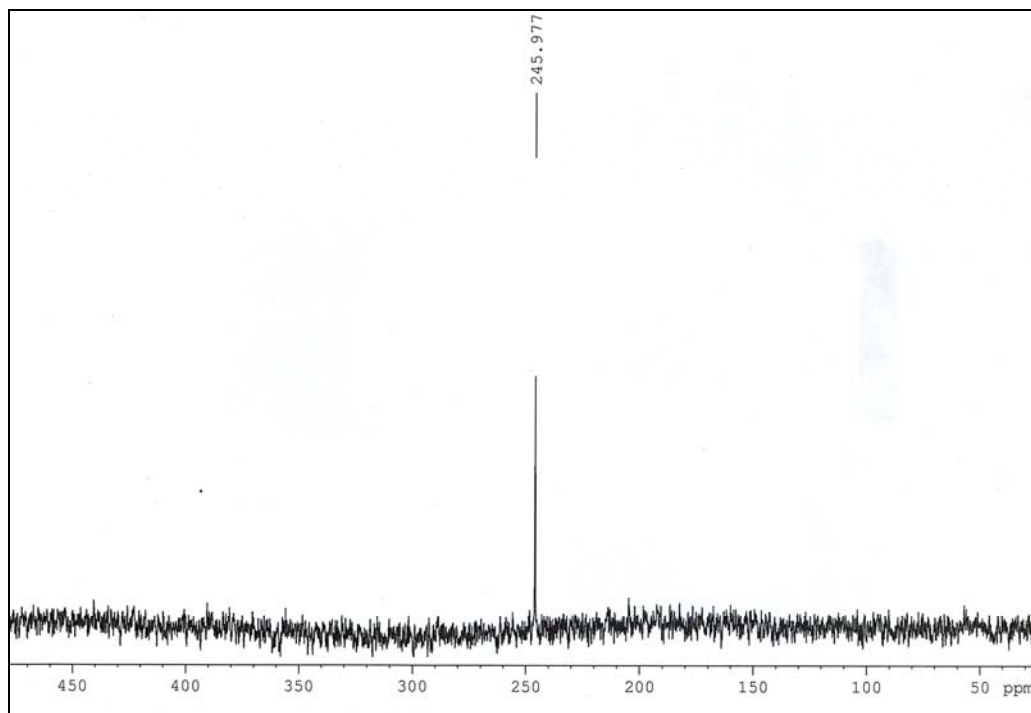

**Figure S20.** ESI mass Spectrum of the compound **25**. Calculated Mass: 545.1555, found 545.0529.

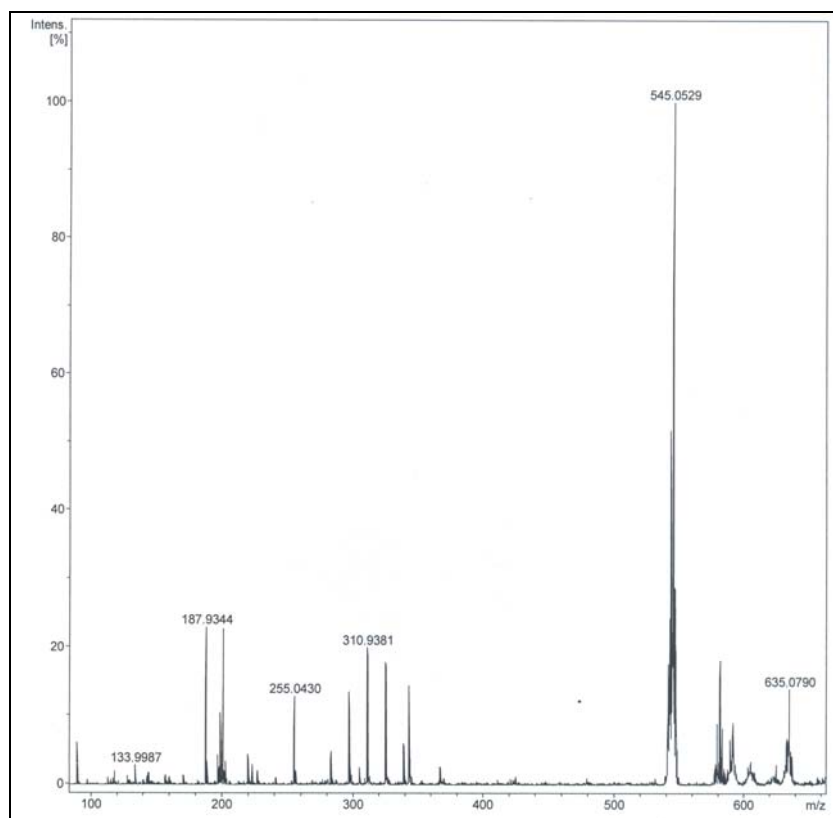

**Figure S21.**  $^1\text{H}$  NMR Spectrum of Compound **26** in  $\text{CDCl}_3$

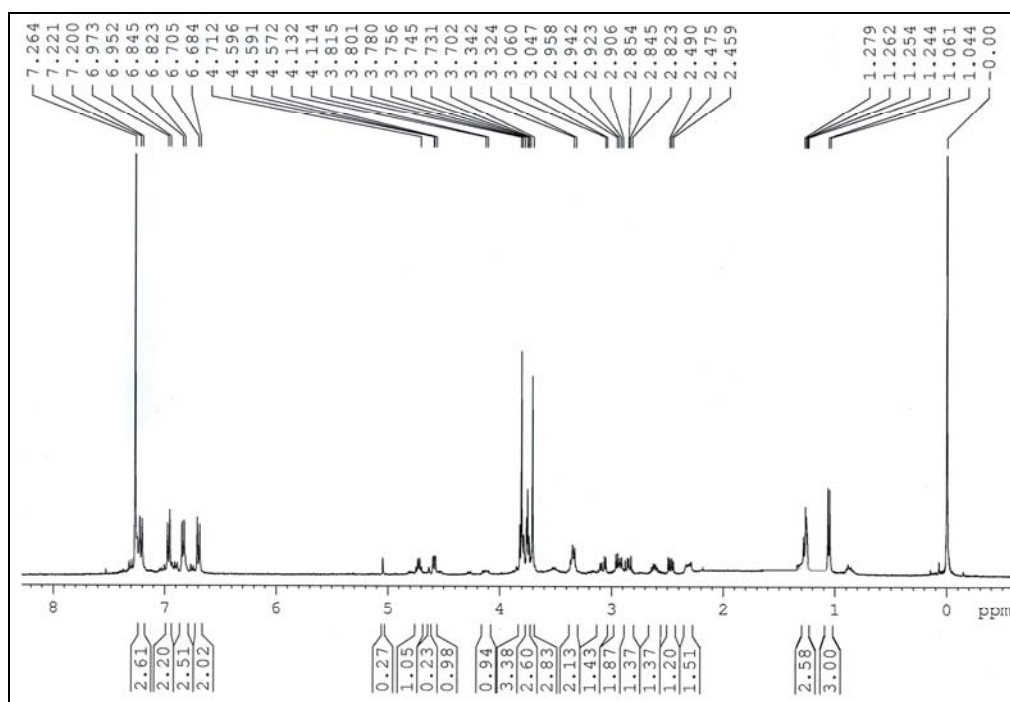



**Figure S22.**  $^{13}\text{C}$  NMR Spectrum of Compound **26** in  $\text{CDCl}_3$

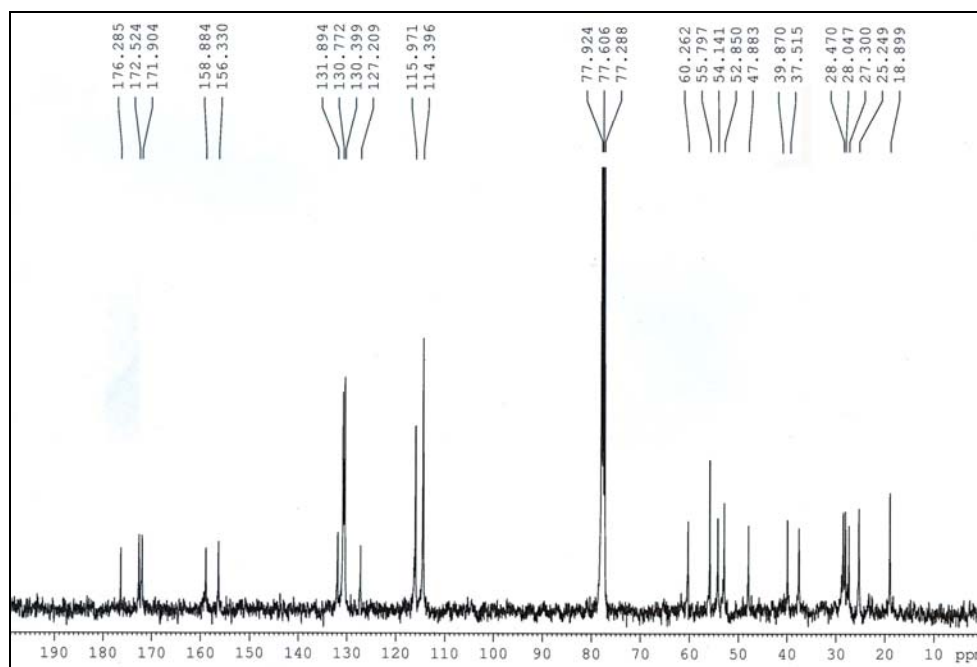

**Figure S23.**  $^{77}\text{Se}$  NMR Spectrum of Compound **26** in  $\text{CDCl}_3$

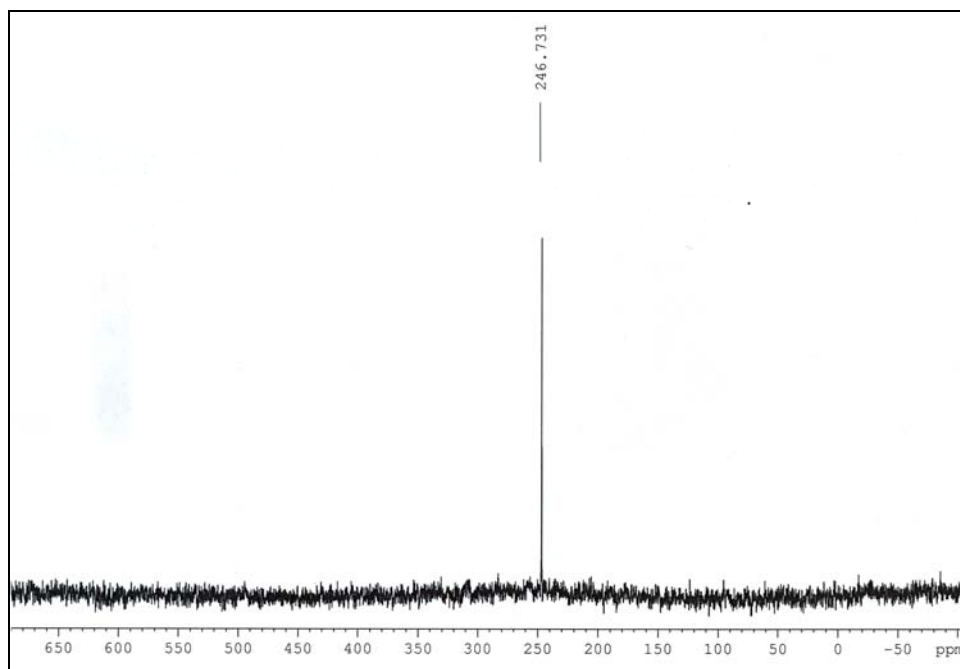

**Figure S24.** ESI mass Spectrum of the compound **26**. Calculated Mass: 585.1480, found 585.2116.

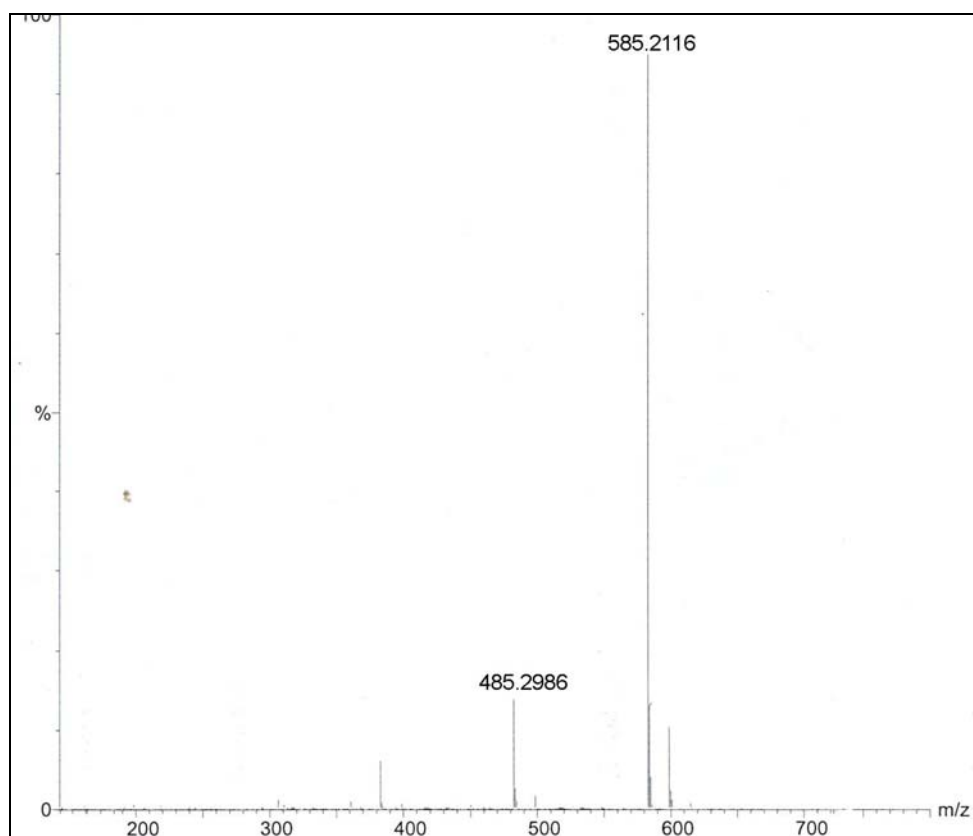

**Figure S25.**  $^1\text{H}$  NMR Spectrum of Compound **27** in  $\text{CDCl}_3$

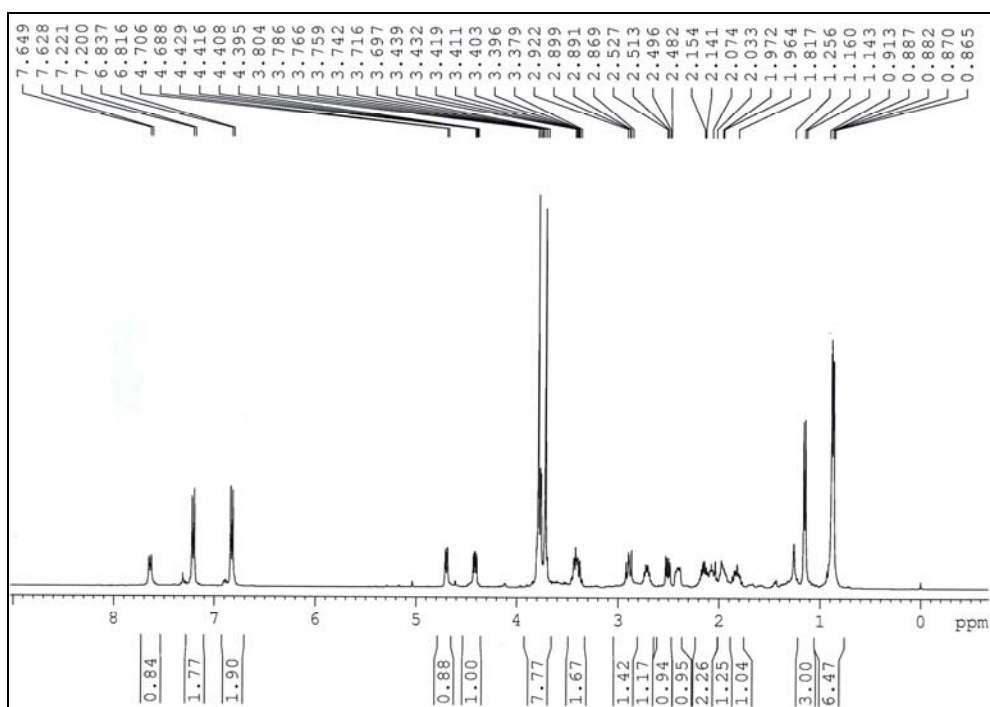

**Figure S26.**  $^{13}\text{C}$  NMR Spectrum of Compound **27** in  $\text{CDCl}_3$

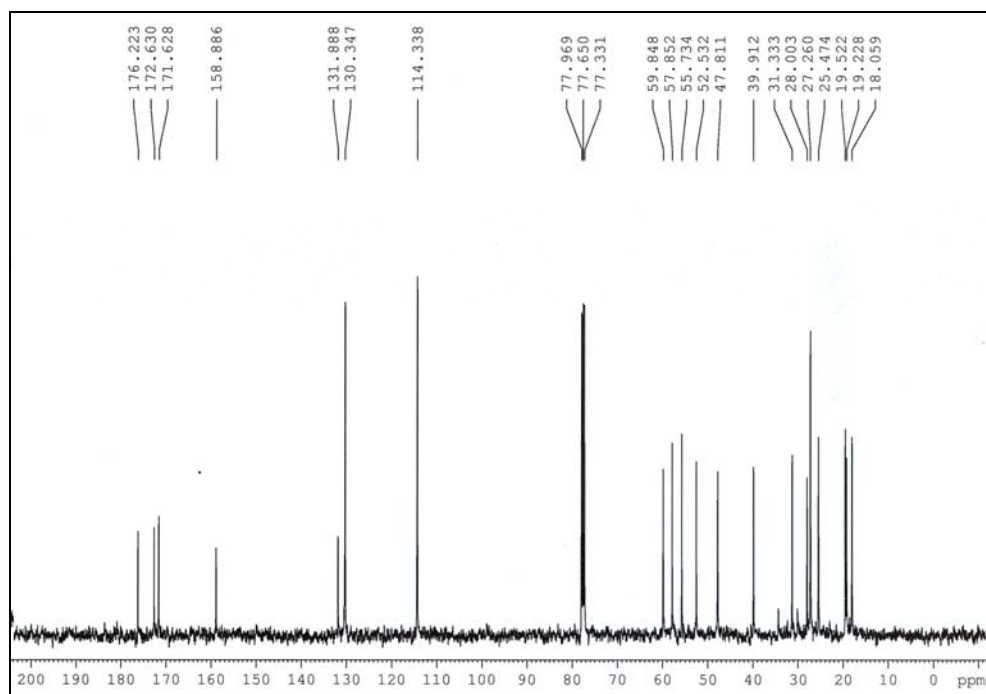

**Figure S27.**  $^{77}\text{Se}$  NMR Spectrum of Compound **27** in  $\text{CDCl}_3$

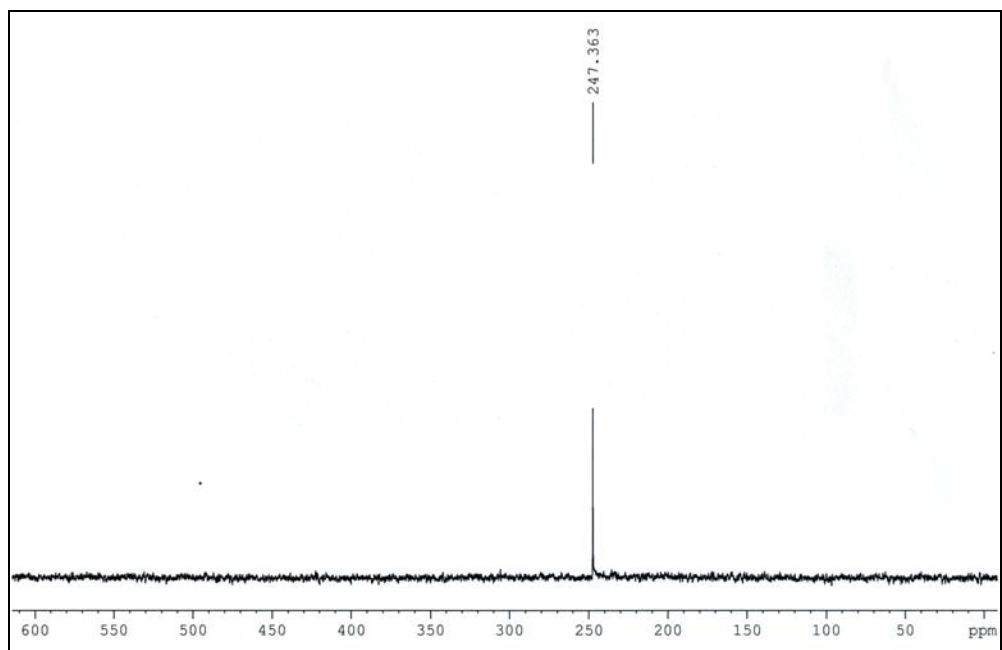

**Figure S28.** ESI mass Spectrum of the compound **27**. Calculated Mass: 521.1531, found 521.1171.

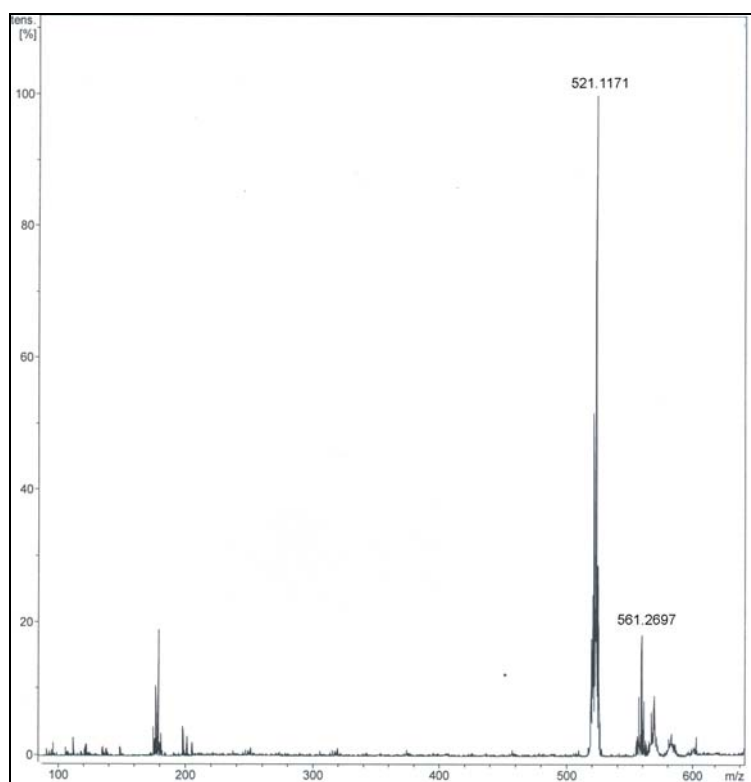

**Figure S29.**  $^1\text{H}$  NMR Spectrum of Compound **28** in  $\text{CDCl}_3$

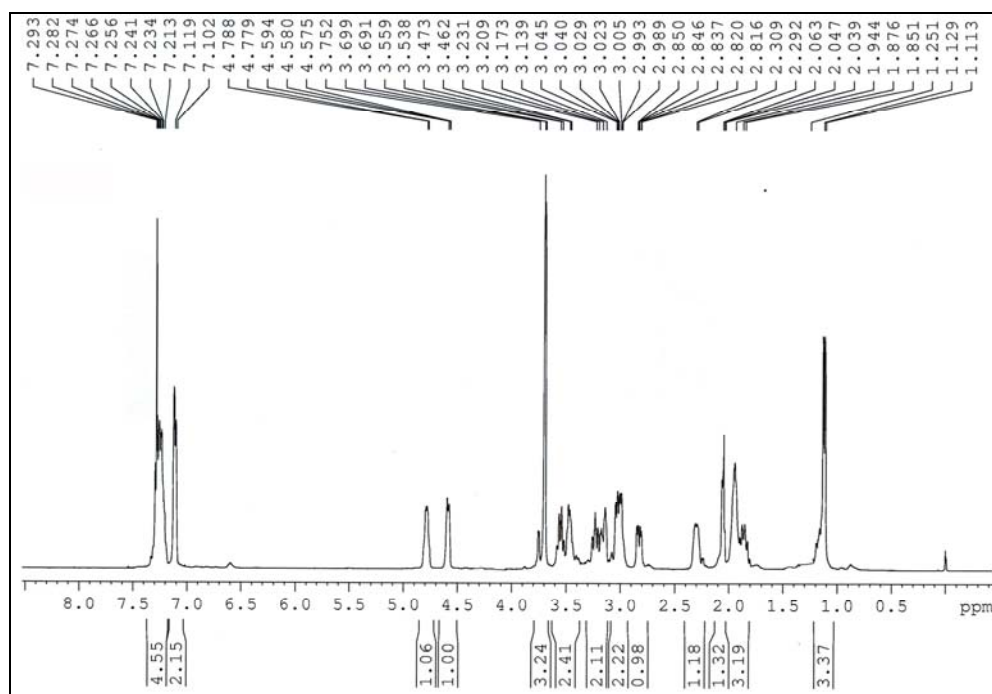

**Figure S30.**  $^{13}\text{C}$  NMR Spectrum of Compound **28** in  $\text{CDCl}_3$

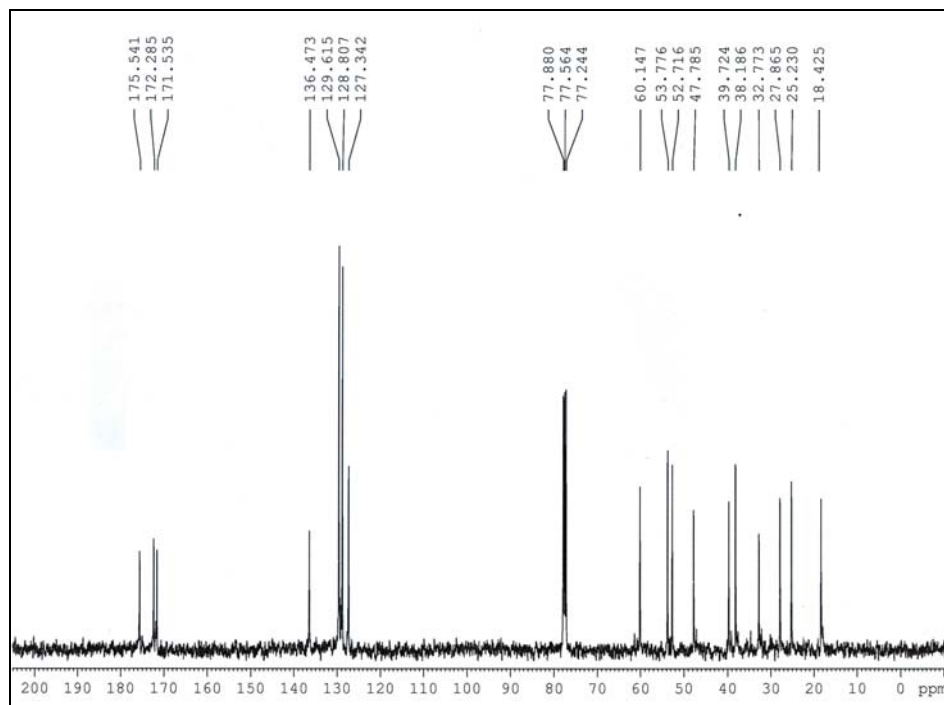

**Figure S31.**  $^{77}\text{Se}$  NMR Spectrum of Compound **28** in  $\text{CDCl}_3$

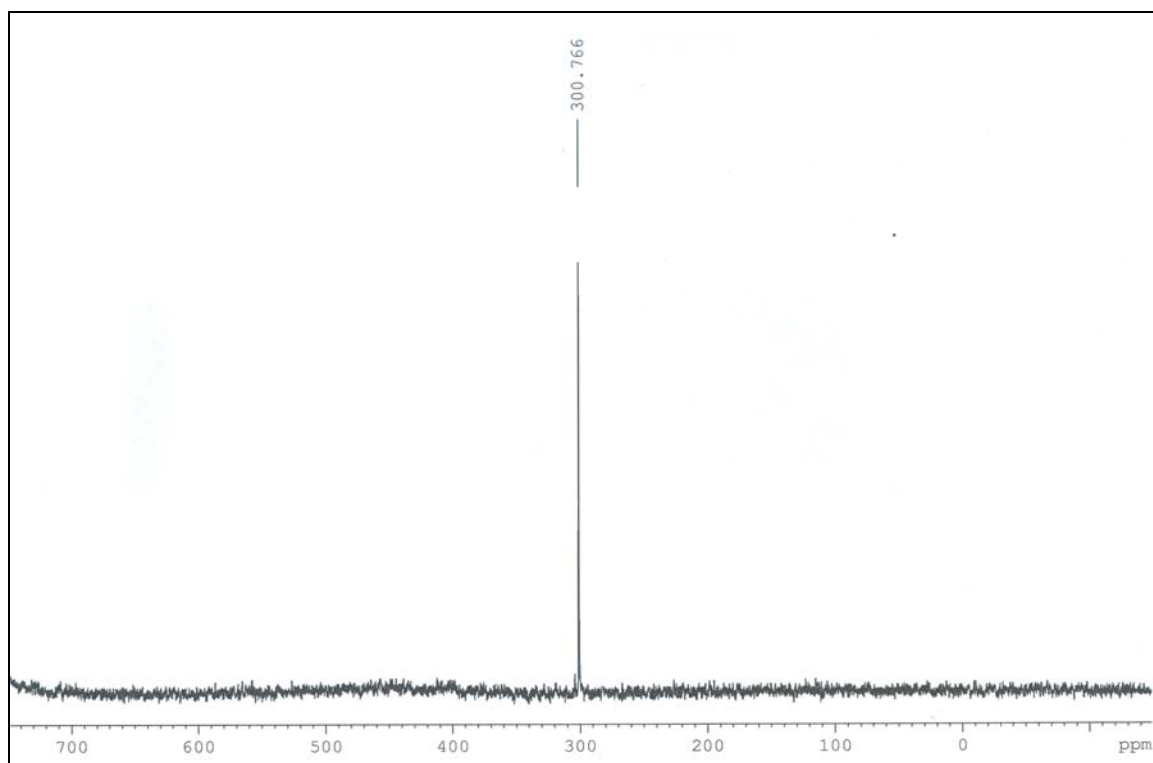

**Figure S32.** ESI mass Spectrum of the compound **28**. Calculated Mass: 873.1857, found 873.1855

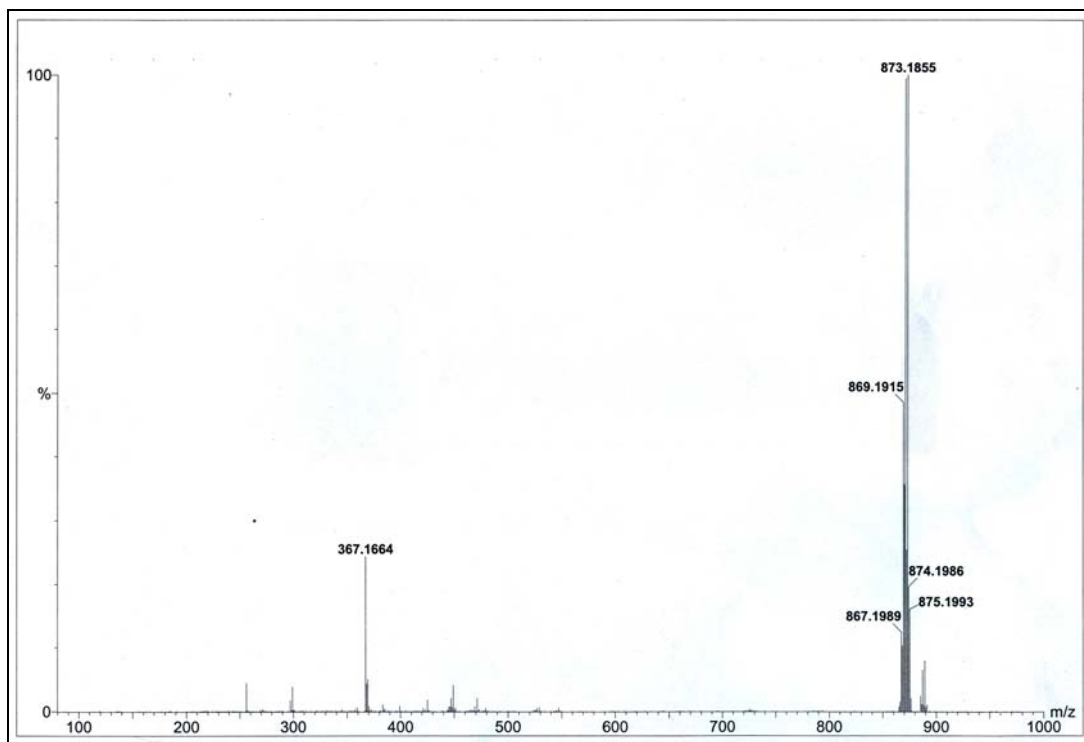

**Figure S33.**  $^1\text{H}$  NMR Spectrum of Compound **29** in  $\text{CDCl}_3$

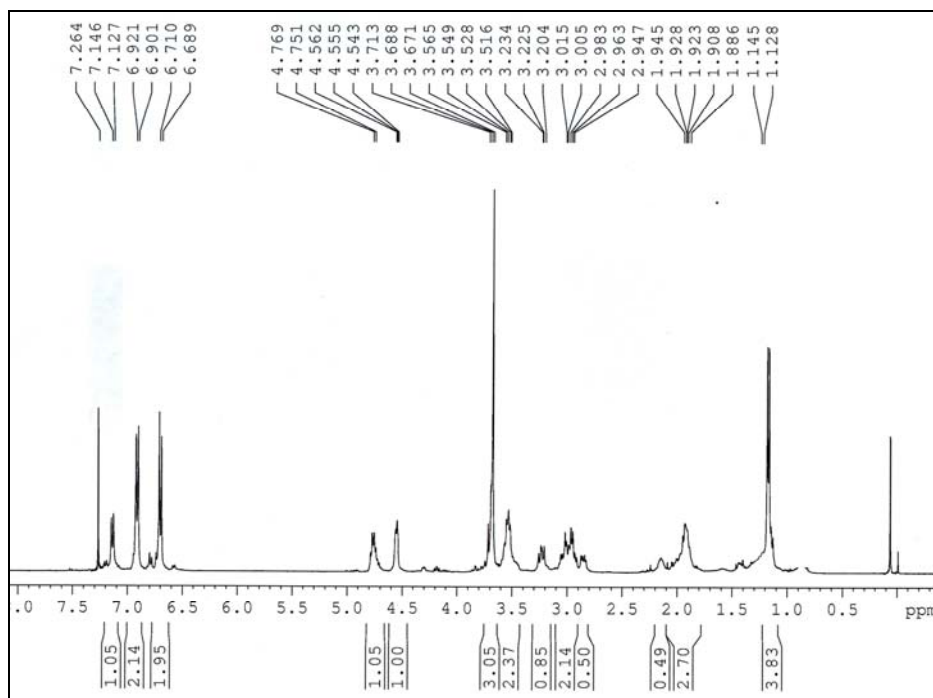

**Figure S34.**  $^{13}\text{C}$  NMR Spectrum of Compound **29** in  $\text{CDCl}_3$

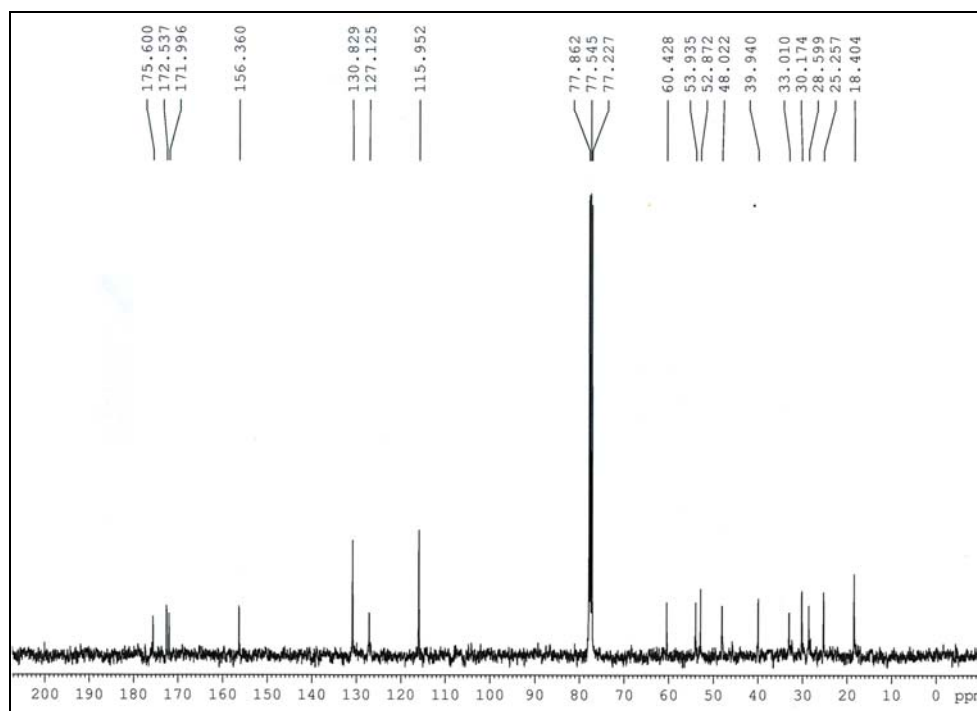

**Figure S35.**  $^{77}\text{Se}$  NMR Spectrum of Compound **29** in  $\text{CDCl}_3$

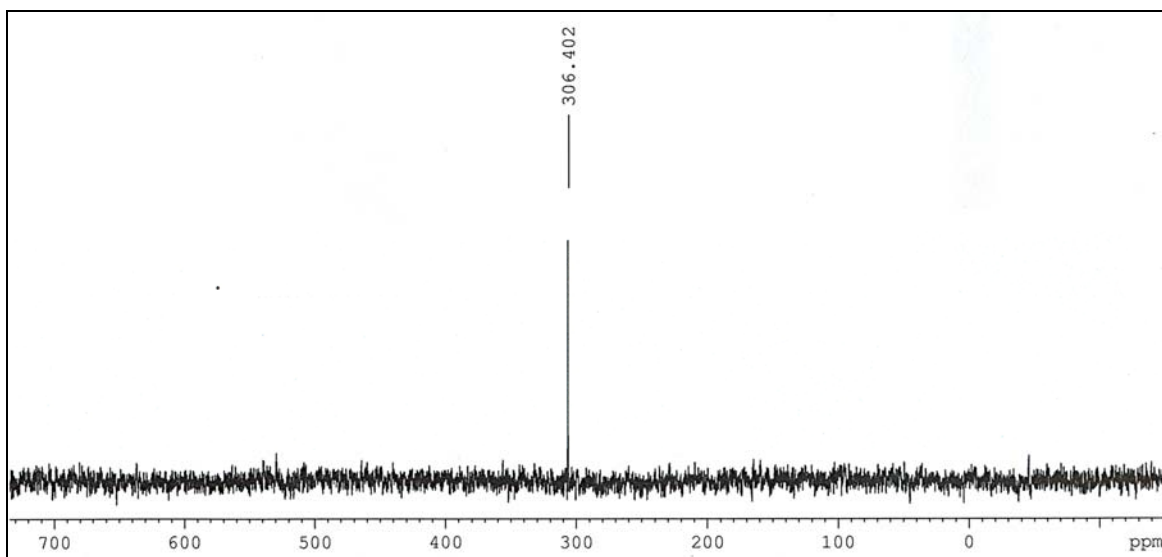

**Figure S36.** ESI mass Spectrum of the compound **29**. Calculated Mass: 905.1755, found 905.3151.

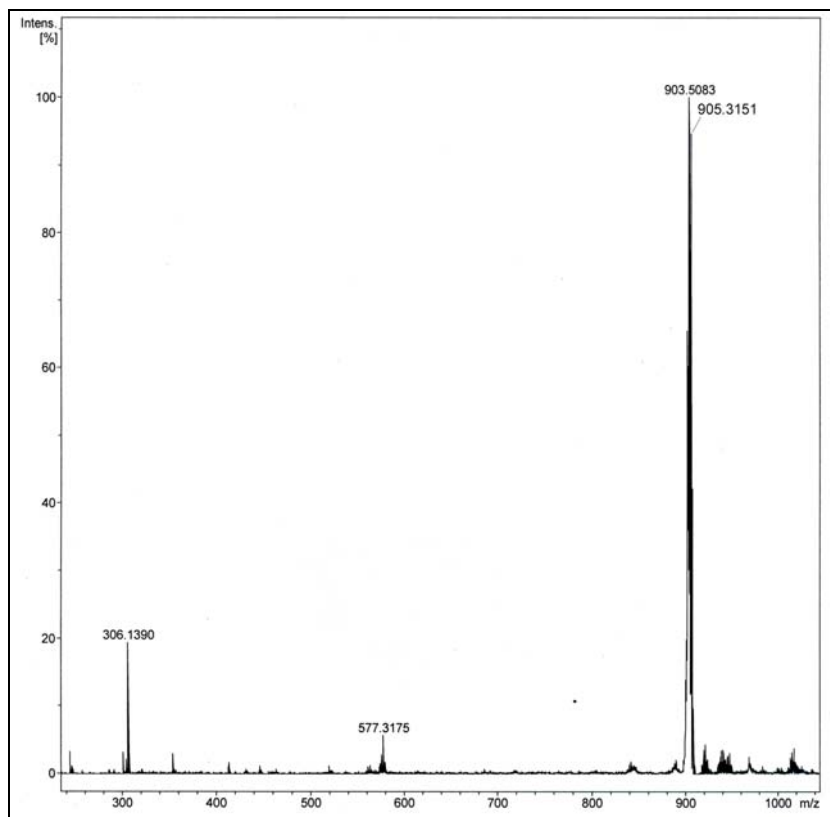

**Figure S37.**  $^1\text{H}$  NMR Spectrum of Compound **30** in  $\text{CDCl}_3$

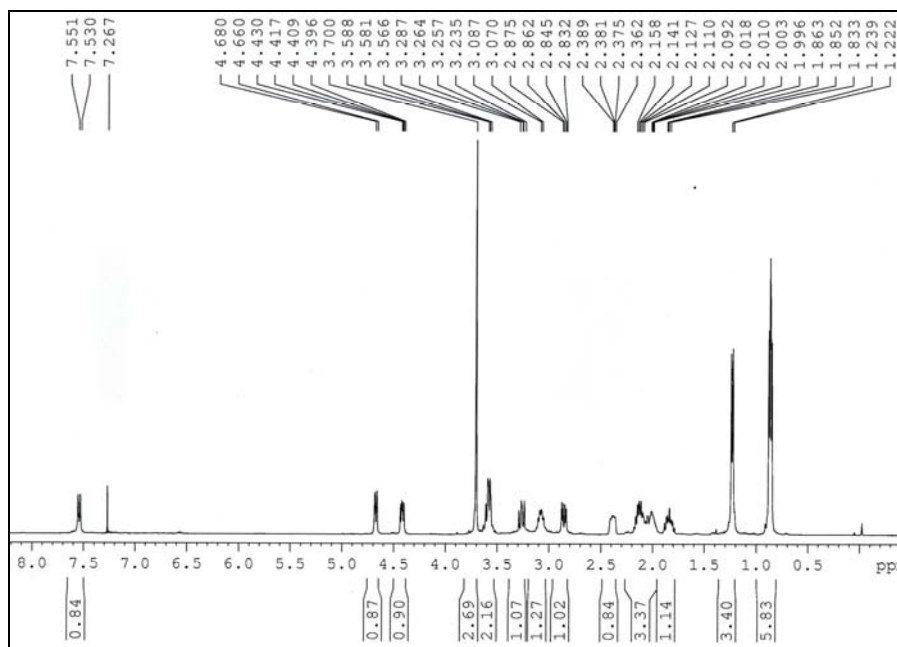



**Figure S38.**  $^{13}\text{C}$  NMR Spectrum of Compound **30** in  $\text{CDCl}_3$

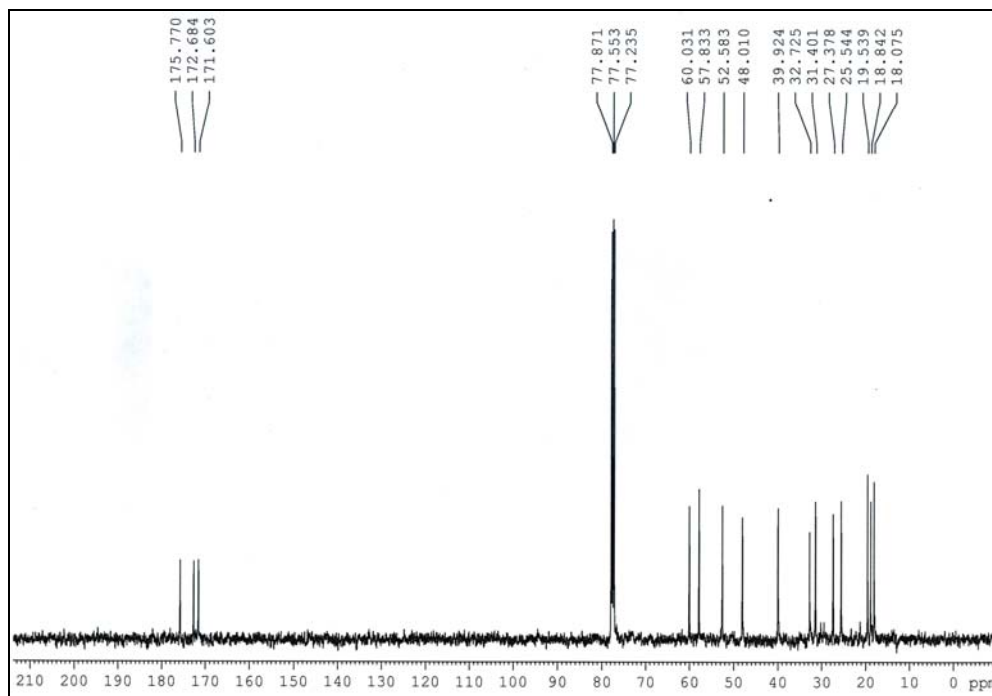

**Figure S39.**  $^{77}\text{Se}$  NMR Spectrum of Compound **30** in  $\text{CDCl}_3$

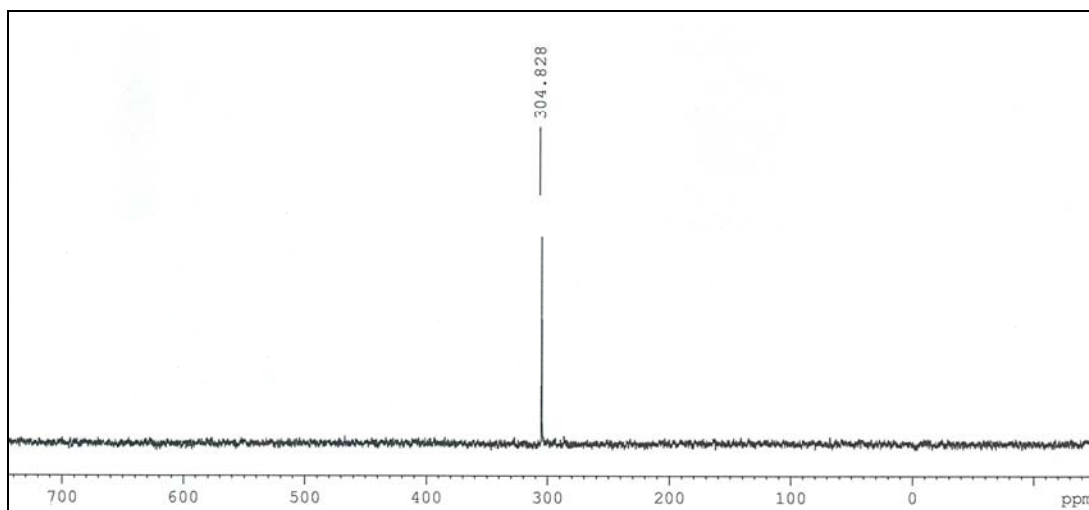

**Figure S40.** ESI mass Spectrum of the compound **30**. Calculated Mass: 777.1857, found 777.2000

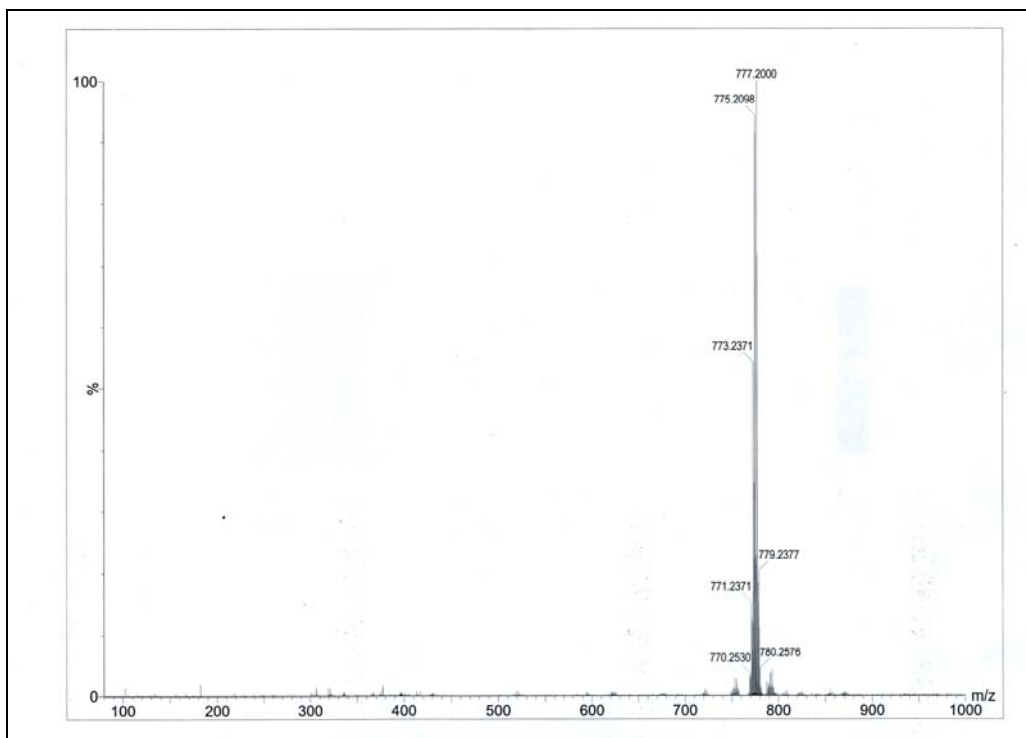

**Figure S41.**  $^1\text{H}$  NMR Spectrum of Compound **31** in  $\text{CDCl}_3$

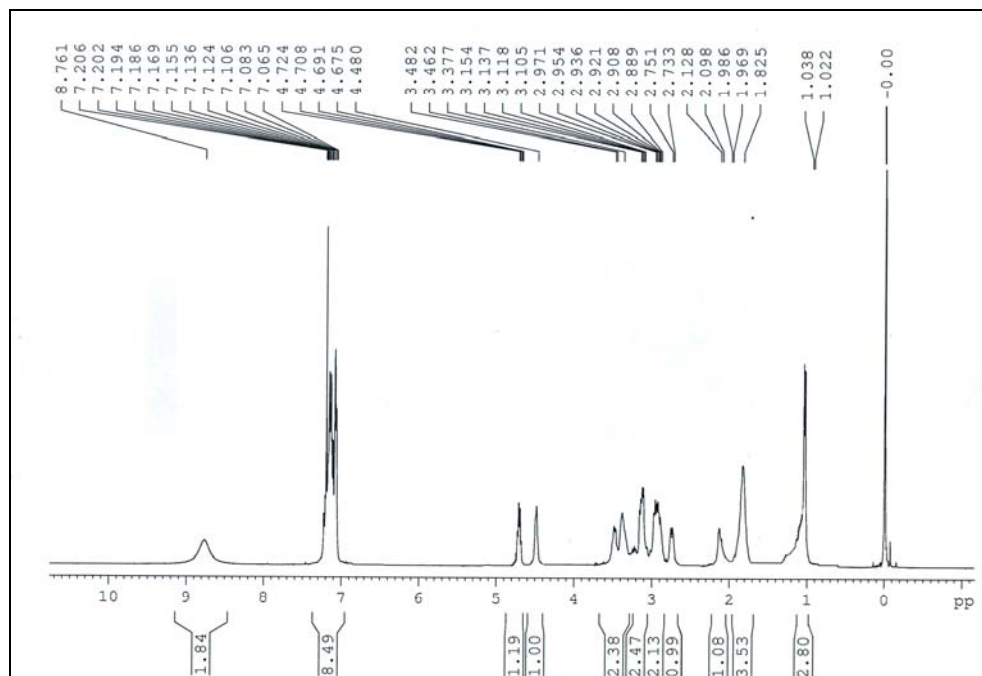

**Figure S42.**  $^{13}\text{C}$  NMR Spectrum of Compound **31** in  $\text{CDCl}_3$

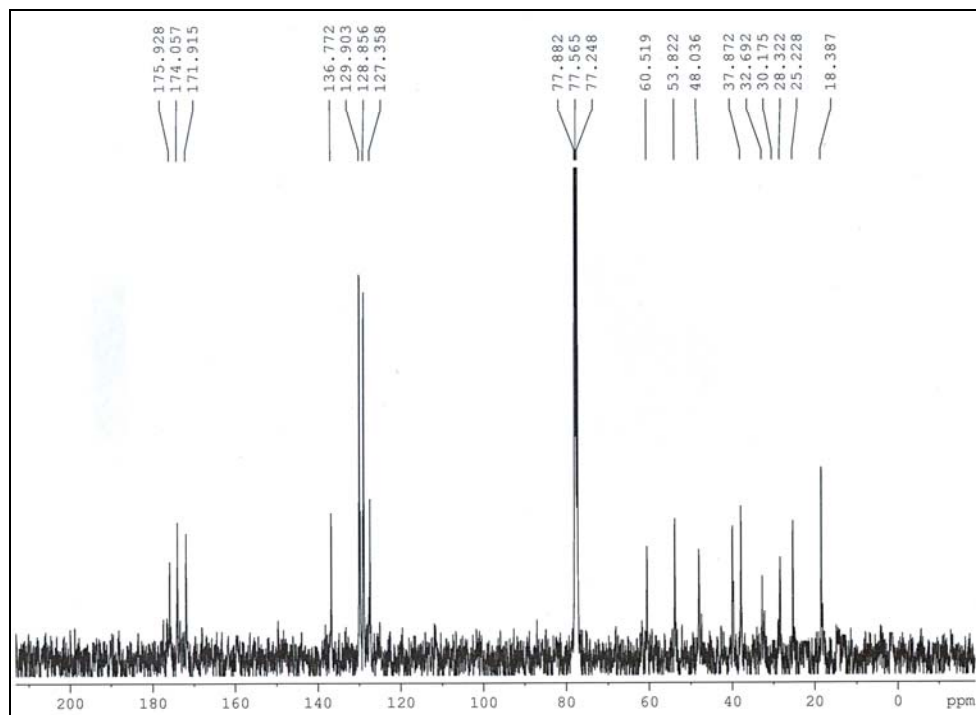

**Figure S43.**  $^{77}\text{Se}$  NMR Spectrum of Compound **31** in  $\text{CDCl}_3$

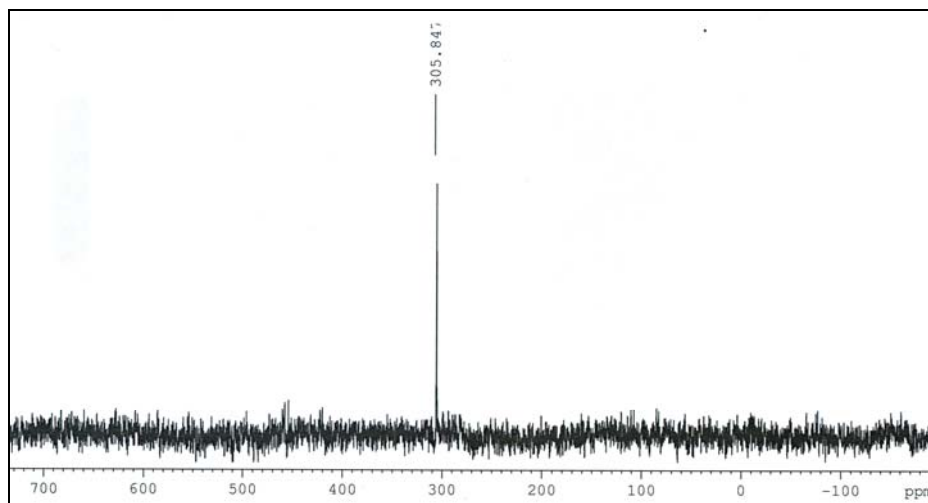

**Figure S44.** ESI mass Spectrum of the compound **31**. Calculated Mass: 845.1544, found 845.1724

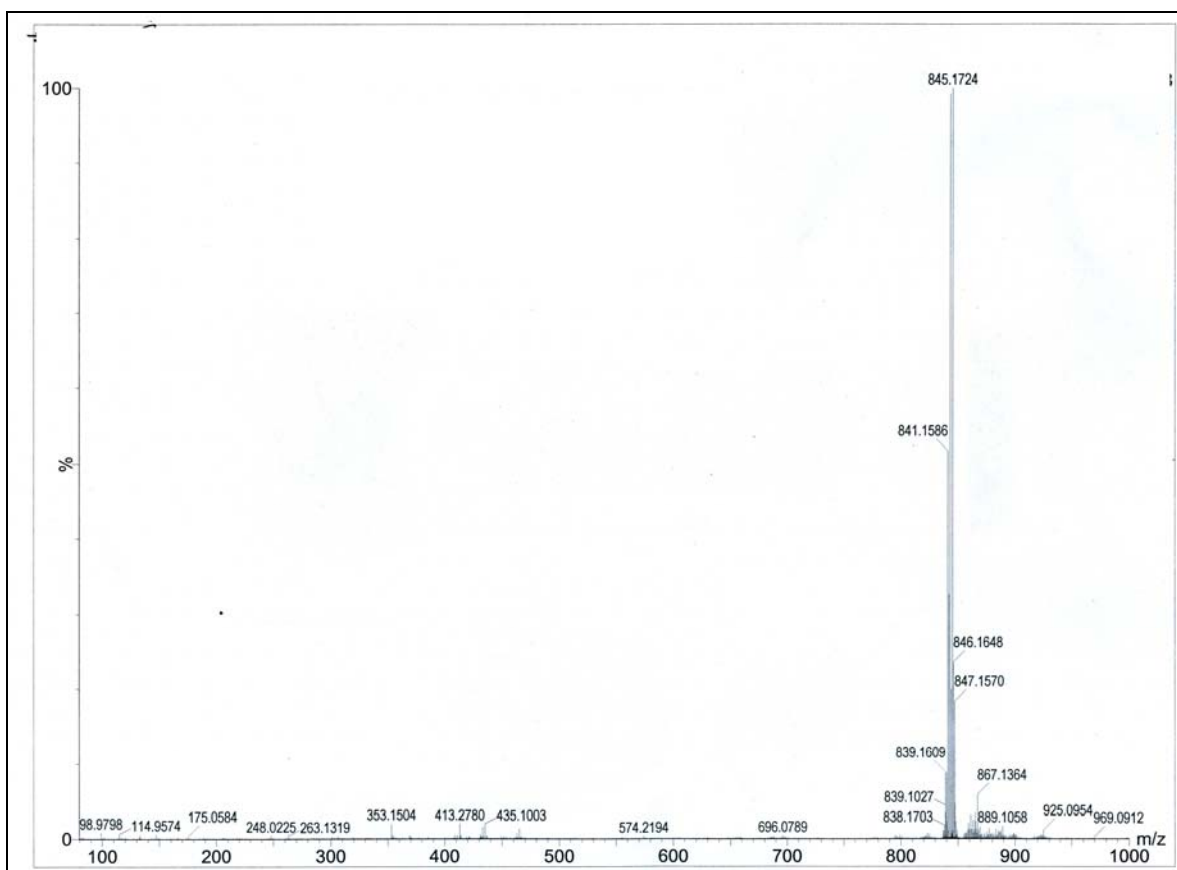

**Figure S45.**  $^1\text{H}$  NMR Spectrum of Compound **32** in  $\text{MeOH-d}_4$

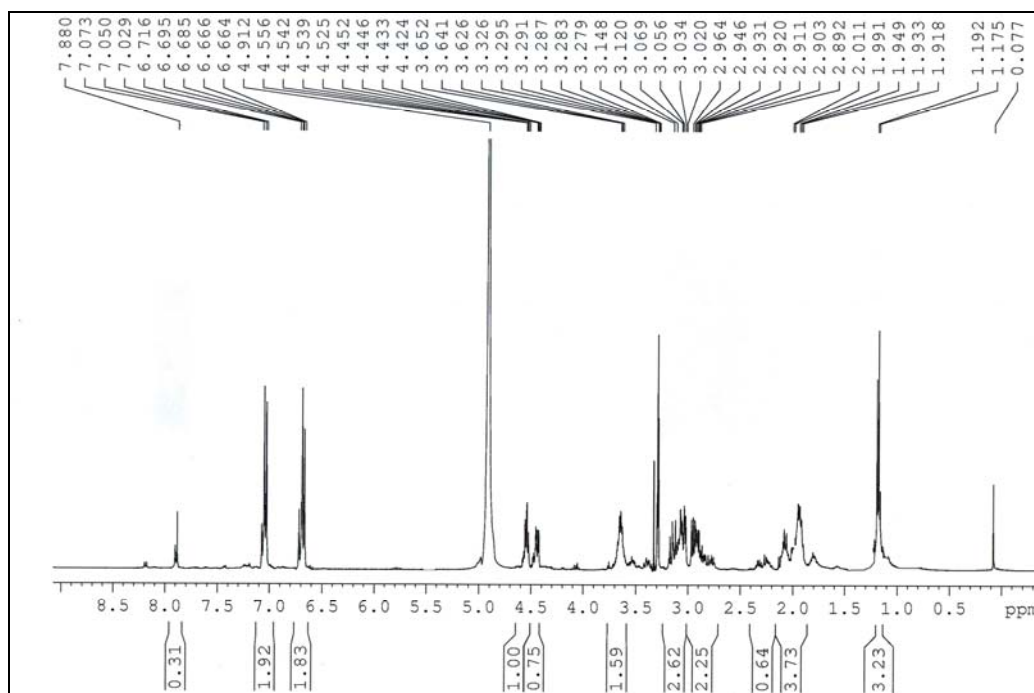

**Figure S46.**  $^{13}\text{C}$  NMR Spectrum of Compound **32** in  $\text{MeOH-d}_4$

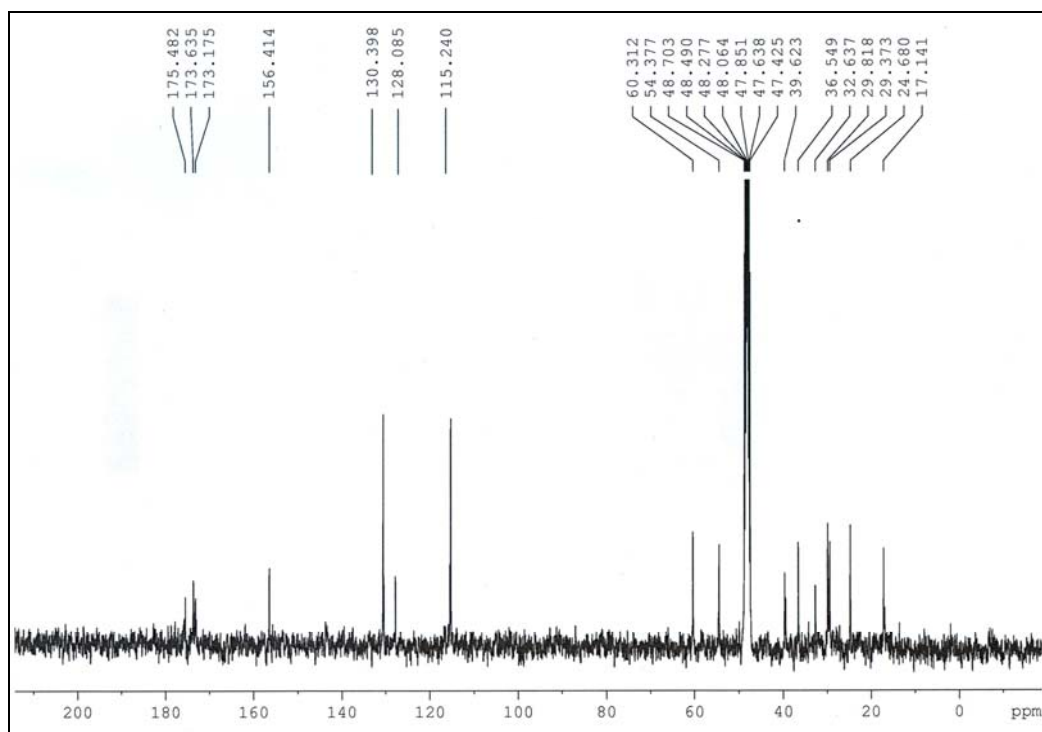

**Figure S47.**  $^{77}\text{Se}$  NMR Spectrum of Compound **32** in  $\text{MeOH-d}_4$

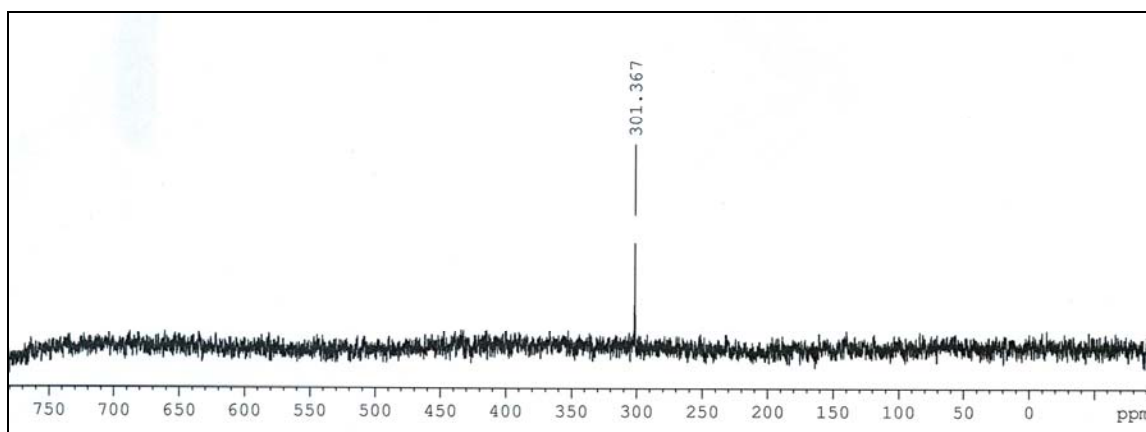

**Figure S48.** ESI mass Spectrum of the compound **32**. Calculated Mass: 877.1442, found 877.2111

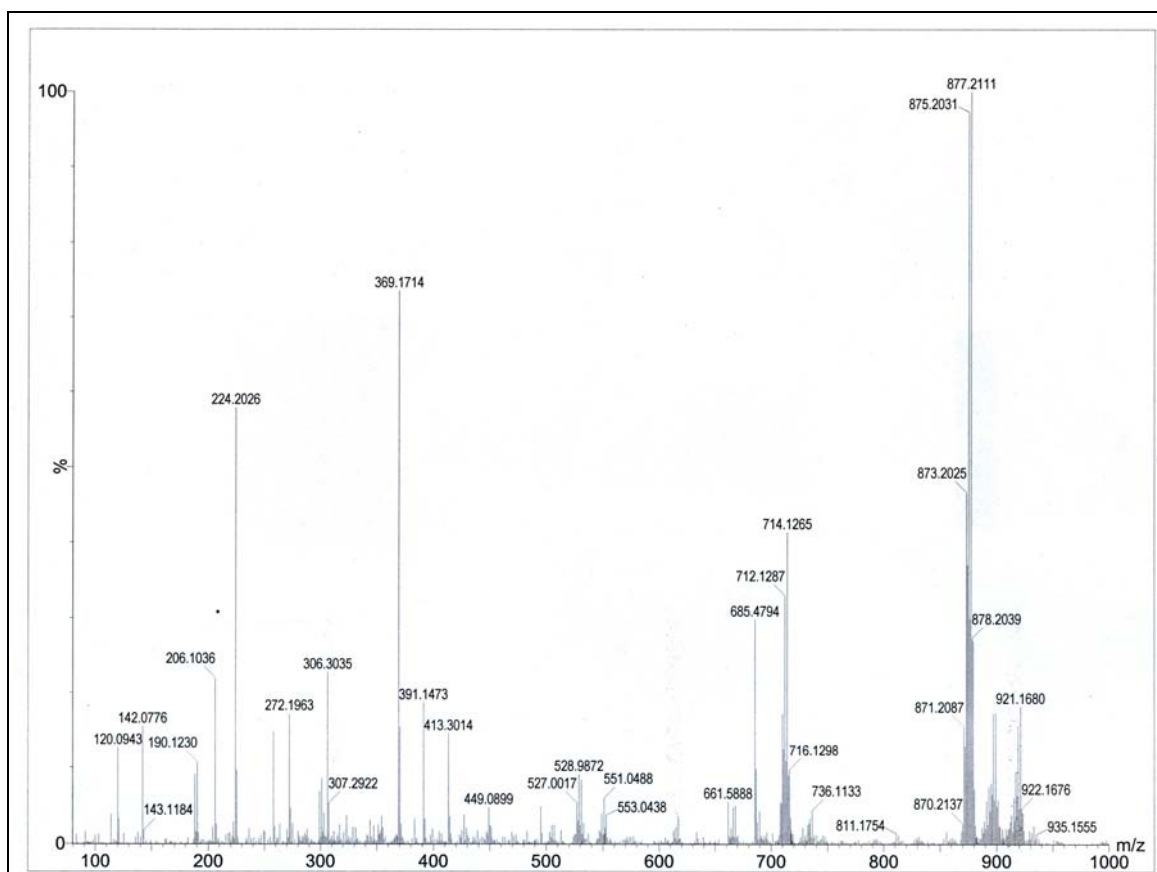

**Figure S49.**  $^{77}\text{Se}$  NMR Spectrum of Compound **33** in  $\text{CDCl}_3$

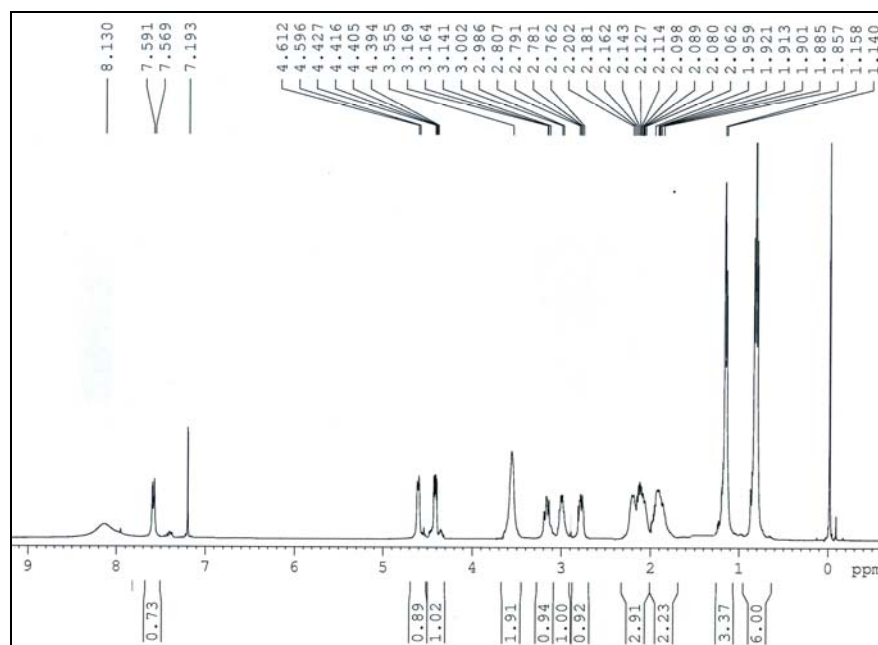

**Figure S50.**  $^{13}\text{C}$  NMR Spectrum of Compound **33** in  $\text{CDCl}_3$

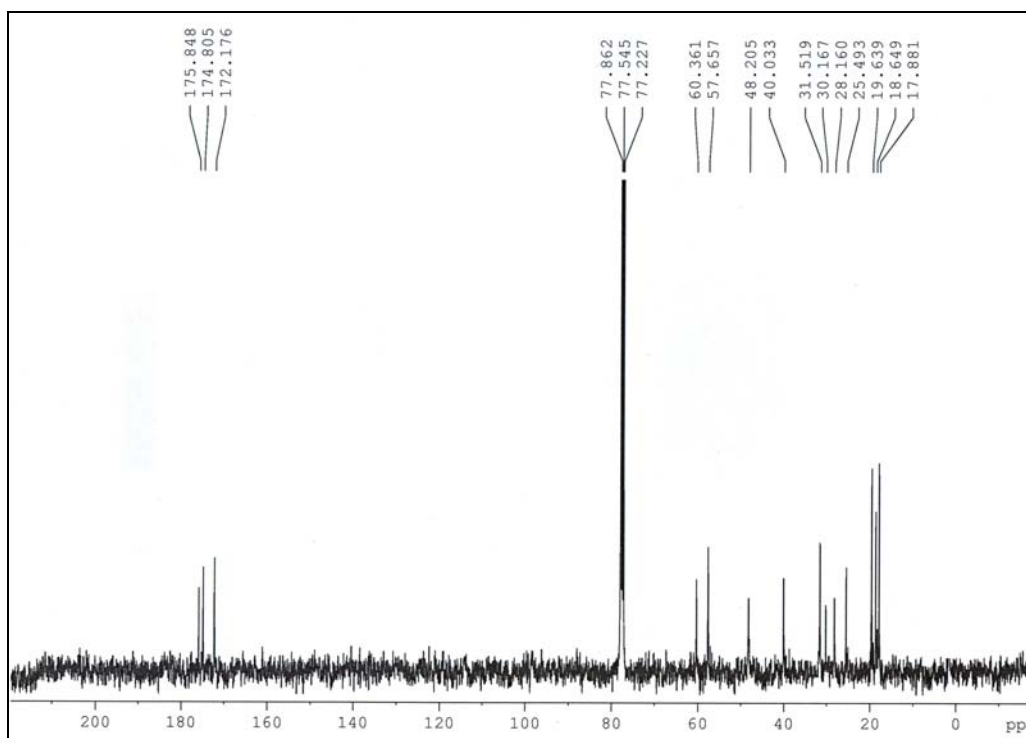

**Figure S51.**  $^{77}\text{Se}$  NMR Spectrum of Compound **33** in  $\text{CDCl}_3$

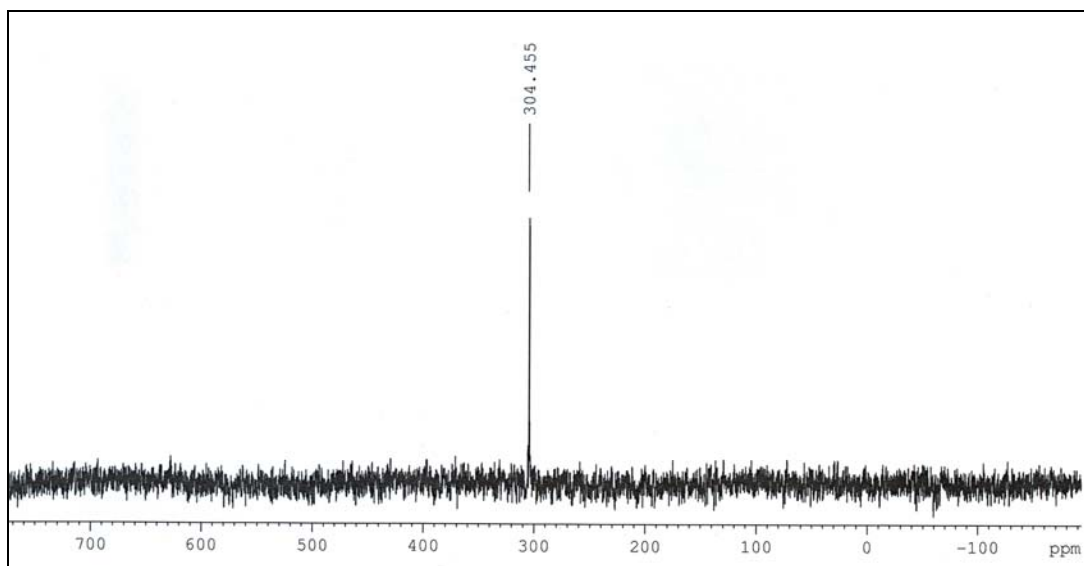

**Figure S52.** ESI mass Spectrum of the compound **33**. Calculated Mass: 749.1544, found 749.1534

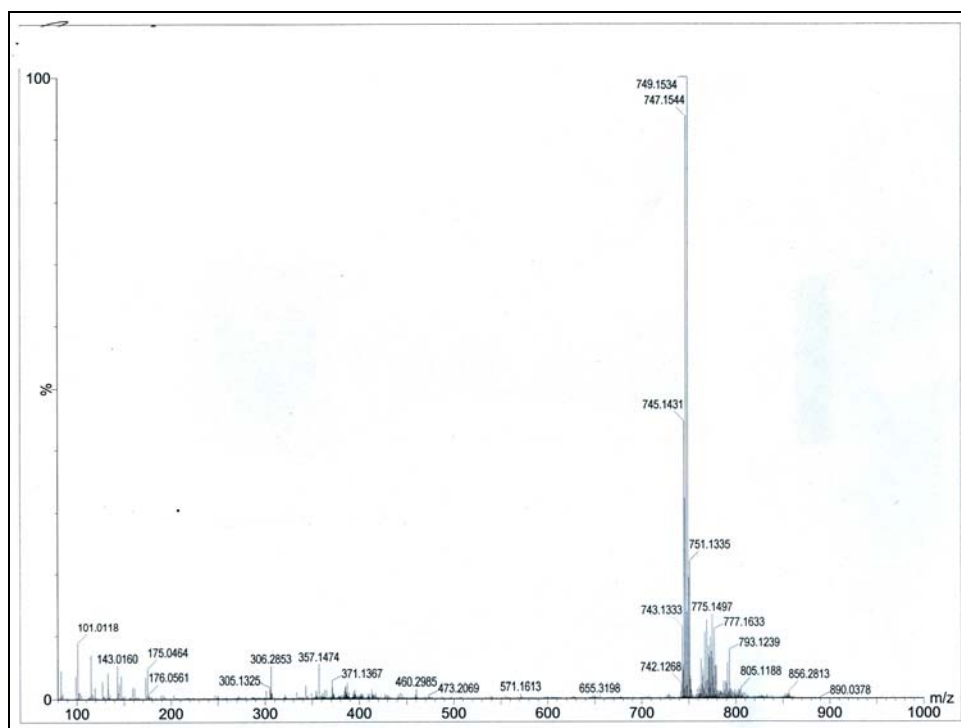

Supplement: c1ob05148b.pdf [file c1ob05148b.pdf]
